# Supplementary material for: Optimal design of parallel triplex forming oligonucleotides containing Twisted Intercalating Nucleic Acids—TINA
Source: PubMed Central journal article supplement — Nucleic Acids Res. 2010 Mar 24;38(13):4394–403. doi: 10.1093/nar/gkq188 (PMC2910062; doi:10.1093/nar/gkq188), 2010-03-24
Supplement: gkq188_1.pdf [file gkq188_1.pdf]

**Supplementary data - table 1. Triplexes with TINA in the TFO strand**  
 Tm data for parallel triplexes with one to four TINAs in the TFO strand, base mismatches in the target strand and D-256 as AD strand. Tm for parallel triplexes and parallel duplexes was determined using 1.0 μM of each strand in sodium acetate buffer (50 mM NaOAc, 100 mM NaCl and 10 mM MgCl<sub>2</sub>) at pH 5.0. Tm for antiparallel duplexes was determined using 0.5 μM of each strand in sodium phosphate buffer (50 mM NaH<sub>2</sub>PO<sub>4</sub>/Na<sub>2</sub>HPO<sub>4</sub>, 100 mM NaCl and 0.1 mM EDTA) at pH 7.0. All dissociation curves were run with a ramp rate of 3°C/minute. X symbolises TINA.

| Oligo name   | Target sequence                                                                                                                                                                                                                                                                                                                                                                                                   | D-200                              | D-201                             | D-202                        | D-203                        | D-204                        | D-205                        | D-206                        | D-222                        | D-213                        | D-214                        | D-215                        | D-218                        | D-207                        | D-208                        | D-209                        | D-210                        | D-211                        | D-212                        | D-224                        | Control                      |                                             |       |       |
|--------------|-------------------------------------------------------------------------------------------------------------------------------------------------------------------------------------------------------------------------------------------------------------------------------------------------------------------------------------------------------------------------------------------------------------------|------------------------------------|-----------------------------------|------------------------------|------------------------------|------------------------------|------------------------------|------------------------------|------------------------------|------------------------------|------------------------------|------------------------------|------------------------------|------------------------------|------------------------------|------------------------------|------------------------------|------------------------------|------------------------------|------------------------------|------------------------------|---------------------------------------------|-------|-------|
| TFO sequence | All triplexes consist of a target sequence (columns) with or without base mismatch + an antiparallel duplex (AD) sequence (D-256: 5'-GTATCCCTCCCTTCTTTCCCTCCCT 3') + a triplex forming oligonucleotide (TFO) sequence (rows). AD D-484 is an antiparallel duplex consisting of D-484 and a target sequence. PD D-284 is a parallel duplex (PD) consisting of a target and a TFO sequence without the AD sequence. | 5'-ATT0495-AGGGAAAAGAGGGAGGATAC 3' | ATT0495-AGGGAAAAGAGGGAGGATAC      | ATT0495-AGGGAAAAGAGGGAGGATAC | ATT0495-AGGGAAAAGAGGGAGGATAC | ATT0495-AGGGAAAAGAGGGAGGATAC | ATT0495-AGGGAAAAGAGGGAGGATAC | ATT0495-AGGGAAAAGAGGGAGGATAC | ATT0495-AGGGAAAAGAGGGAGGATAC | ATT0495-AGGGAAAAGAGGGAGGATAC | ATT0495-AGGGAAAAGAGGGAGGATAC | ATT0495-AGGGAAAAGAGGGAGGATAC | ATT0495-AGGGAAAAGAGGGAGGATAC | ATT0495-AGGGAAAAGAGGGAGGATAC | ATT0495-AGGGAAAAGAGGGAGGATAC | ATT0495-AGGGAAAAGAGGGAGGATAC | ATT0495-AGGGAAAAGAGGGAGGATAC | ATT0495-AGGGAAAAGAGGGAGGATAC | ATT0495-AGGGAAAAGAGGGAGGATAC | ATT0495-AGGGAAAAGAGGGAGGATAC | ATT0495-AGGGAAAAGAGGGAGGATAC | Setup and run control D-200 + D-256 + D-284 |       |       |
|              |                                                                                                                                                                                                                                                                                                                                                                                                                   | D-284                              | 5'-ATT0590-TCCCTTTTCCTCCCTCCCT 3' | 73.51                        | 65.92                        | 65.44                        | 66.14                        | 61.42                        | 63.16                        | 61.12                        | 58.36                        | 60.90                        | 61.03                        | 61.42                        | 62.85                        | 61.72                        | 60.14                        | 61.59                        | 65.76                        | 65.28                        | 65.19                        |                                             | 52.72 |       |
|              |                                                                                                                                                                                                                                                                                                                                                                                                                   | D-285                              | ATT0590-TCCCTTTTCCTCCCTCCCT       | 75.03                        | 67.34                        | 66.81                        | 67.44                        | 63.55                        | 65.16                        | 63.66                        | 62.58                        | 63.40                        | 64.65                        | 63.86                        | 65.52                        | 64.09                        | 63.91                        | 63.73                        | 67.64                        | 67.25                        | 66.89                        |                                             | 57.91 | 73.59 |
|              |                                                                                                                                                                                                                                                                                                                                                                                                                   | D-286                              | ATT0590-TCCCTTTTCCTCCCTCCCT       | 74.07                        | 67.86                        | 67.07                        | 67.90                        | 62.34                        | 64.16                        | 62.37                        | 59.76                        | 61.58                        | 62.08                        | 62.08                        | 63.96                        | 62.49                        | 61.43                        | 62.29                        | 66.6                         | 66.06                        | 65.81                        |                                             | 53.89 | 73.56 |
|              |                                                                                                                                                                                                                                                                                                                                                                                                                   | D-287                              | ATT0590-TCCCTTTTCCTCCCTCCCT       | 74.18                        | 68.66                        | 67.72                        | 68.86                        | 63.23                        | 64.52                        | 62.71                        | 59.47                        | 61.43                        | 61.66                        | 61.90                        | 63.64                        | 62.41                        | 60.78                        | 62.39                        | 66.89                        | 66.14                        | 66.11                        |                                             | 54.16 | 73.51 |
|              |                                                                                                                                                                                                                                                                                                                                                                                                                   | D-288                              | ATT0590-TCCCTTTTCCTCCCTCCCT       | 74.18                        | 68.92                        | 67.68                        | 68.85                        | 68.74                        | 64.86                        | 64.92                        | 59.3                         | 61.78                        | 61.23                        | 61.90                        | 63.69                        | 62.69                        | 60.57                        | 62.69                        | 67.43                        | 66.60                        | 66.71                        |                                             | 54.71 | 73.58 |
|              |                                                                                                                                                                                                                                                                                                                                                                                                                   | D-289                              | ATT0590-TCCCTTTTCCTCCCTCCCT       | 75.61                        | 71.19                        | 69.97                        | 71.47                        | 66.92                        | 66.17                        | 66.80                        | 61.52                        | 63.52                        | 63.52                        | 63.67                        | 65.31                        | 64.57                        | 63.19                        | 64.72                        | 69.51                        | 68.66                        | 68.94                        |                                             | 58.73 | 73.71 |
|              |                                                                                                                                                                                                                                                                                                                                                                                                                   | D-290                              | ATT0590-TCCCTTTTCCTCCCTCCCT       | 78.16                        | 67.83                        | 69.70                        | 67.80                        | 69.32                        | 68.85                        | 69.67                        | 64.11                        | 66.20                        | 66.08                        | 66.11                        | 68.23                        | 67.70                        | 66.27                        | 68.05                        | 72.34                        | 71.86                        | 72.01                        |                                             | 60.07 | 73.55 |
|              |                                                                                                                                                                                                                                                                                                                                                                                                                   | D-291                              | ATT0590-TCCCTTTTCCTCCCTCCCT       | 78.39                        | 68.47                        | 70.50                        | 68.49                        | 71.88                        | 70.82                        | 71.88                        | 64.26                        | 66.28                        | 65.89                        | 66.24                        | 68.04                        | 67.81                        | 66.03                        | 68.17                        | 72.61                        | 72.22                        | 72.05                        |                                             | 59.34 | 73.58 |
|              |                                                                                                                                                                                                                                                                                                                                                                                                                   | D-292                              | ATT0590-TCCCTTTTCCTCCCTCCCT       | 79.46                        | 69.59                        | 72.31                        | 69.62                        | 72.43                        | 71.34                        | 72.47                        | 66.31                        | 67.77                        | 67.07                        | 67.8                         | 69.46                        | 68.62                        | 67.04                        | 69.06                        | 73.77                        | 73.44                        | 73.36                        |                                             | 61.81 | 73.59 |
|              |                                                                                                                                                                                                                                                                                                                                                                                                                   | D-293                              | ATT0590-TCCCTTTTCCTCCCTCCCT       | 78.92                        | 69.70                        | 72.75                        | 69.66                        | 69.13                        | 69.35                        | 68.90                        | 69.08                        | 67.11                        | 66.64                        | 67.14                        | 67.76                        | 67.25                        | 65.43                        | 68.04                        | 72.74                        | 72.22                        | 72.25                        |                                             | 65.88 | 73.49 |
|              |                                                                                                                                                                                                                                                                                                                                                                                                                   | D-294                              | ATT0590-TCCCTTTTCCTCCCTCCCT       | 78.26                        | 69.60                        | 69.70                        | 69.64                        | 66.79                        | 69.68                        | 66.32                        | 69.03                        | 70.65                        | 68.30                        | 71.40                        | 68.65                        | 65.88                        | 64.34                        | 66.35                        | 71.69                        | 70.98                        | 70.98                        |                                             | 68.13 | 73.60 |
|              |                                                                                                                                                                                                                                                                                                                                                                                                                   | D-295                              | ATT0590-TCCCTTTTCCTCCCTCCCT       | 79.31                        | 71.38                        | 71.34                        | 71.39                        | 67.31                        | 70.38                        | 67.08                        | 65.00                        | 72.64                        | 70.47                        | 72.89                        | 73.04                        | 68.32                        | 65.84                        | 68.93                        | 72.75                        | 72.36                        | 72.36                        |                                             | 62.96 | 73.56 |
|              |                                                                                                                                                                                                                                                                                                                                                                                                                   | D-296                              | ATT0590-TCCCTTTTCCTCCCTCCCT       | 78.84                        | 71.23                        | 70.96                        | 71.16                        | 67.28                        | 69.51                        | 67.04                        | 63.06                        | 69.37                        | 66.78                        | 68.93                        | 71.98                        | 71.27                        | 67.39                        | 72.70                        | 72.00                        | 71.18                        | 71.60                        |                                             | 63.37 | 73.58 |
|              |                                                                                                                                                                                                                                                                                                                                                                                                                   | D-297                              | ATT0590-TCCCTTTTCCTCCCTCCCT       | 78.29                        | 70.96                        | 70.66                        | 71.11                        | 66.86                        | 69.18                        | 66.49                        | 61.78                        | 64.64                        | 64.72                        | 64.65                        | 67.79                        | 73.85                        | 70.26                        | 74.09                        | 72.49                        | 71.03                        | 72.17                        |                                             | 62.31 | 73.47 |
|              |                                                                                                                                                                                                                                                                                                                                                                                                                   | D-298                              | ATT0590-TCCCTTTTCCTCCCTCCCT       | 78.31                        | 71.37                        | 71.13                        | 71.43                        | 67.38                        | 69.41                        | 67.14                        | 63.58                        | 64.00                        | 64.66                        | 64.29                        | 67.47                        | 74.87                        | 71.53                        | 75.00                        | 70.39                        | 70.03                        | 70.18                        |                                             | 61.49 | 73.51 |
|              |                                                                                                                                                                                                                                                                                                                                                                                                                   | D-299                              | ATT0590-TCCCTTTTCCTCCCTCCCT       | 78.15                        | 71.25                        | 70.70                        | 71.06                        | 67.33                        | 69.32                        | 67.19                        | 63.77                        | 65.97                        | 64.66                        | 65.61                        | 68.11                        | 74.41                        | 70.37                        | 75.03                        | 71.20                        | 72.14                        | 71.86                        |                                             | 62.38 | 73.66 |
|              |                                                                                                                                                                                                                                                                                                                                                                                                                   | D-300                              | ATT0590-TCCCTTTTCCTCCCTCCCT       | 79.09                        | 72.19                        | 71.89                        | 72.14                        | 68.43                        | 70.35                        | 68.31                        | 65.25                        | 65.46                        | 66.32                        | 65.97                        | 67.26                        | 67.72                        | 64.96                        | 68.96                        | 75.75                        | 74.59                        | 75.21                        |                                             | 58.29 | 73.57 |
|              |                                                                                                                                                                                                                                                                                                                                                                                                                   | D-301                              | ATT0590-TCCCTTTTCCTCCCTCCCT       | 76.97                        | 69.37                        | 68.99                        | 69.60                        | 65.62                        | 67.48                        | 65.48                        | 61.34                        | 62.28                        | 62.92                        | 62.90                        | 64.88                        | 63.68                        | 61.63                        | 64.02                        | 74.39                        | 73.22                        | 74.14                        |                                             | 54.72 | 73.62 |
|              |                                                                                                                                                                                                                                                                                                                                                                                                                   | D-302                              | ATT0590-TCCCTTTTCCTCCCTCCCT       | 77.64                        | 69.12                        | 68.64                        | 69.23                        | 65.68                        | 67.39                        | 65.09                        | 61.13                        | 62.72                        | 62.87                        | 63.14                        | 64.55                        | 63.51                        | 61.98                        | 63.43                        | 74.07                        | 73.21                        | 73.93                        |                                             | 54.09 | 73.74 |
|              |                                                                                                                                                                                                                                                                                                                                                                                                                   | D-303                              | ATT0590-TCCCTTTTCCTCCCTCCCT       | 77.94                        | 69.84                        | 69.25                        | 69.87                        | 66.22                        | 67.96                        | 65.49                        | 62.20                        | 63.75                        | 64.32                        | 63.86                        | 65.53                        | 64.31                        | 63.31                        | 64.26                        | 72.02                        | 71.35                        | 72.08                        |                                             | 55.64 | 73.61 |
|              |                                                                                                                                                                                                                                                                                                                                                                                                                   | D-304                              | ATT0590-TCCCTTTTCCTCCCTCCCT       | 78.36                        | 70.77                        | 70.37                        | 70.94                        | 67.26                        | 68.91                        | 66.80                        | 63.72                        | 64.95                        | 65.27                        | 65.10                        | 66.60                        | 65.45                        | 64.51                        | 65.28                        | 70.73                        | 69.82                        | 70.41                        |                                             | 58.11 | 73.60 |
|              |                                                                                                                                                                                                                                                                                                                                                                                                                   | D-305                              | ATT0590-TCCCTTTTCCTCCCTCCCT       | 75.66                        | 65.49                        | 65.90                        | 65.72                        | 64.00                        | 66.14                        | 63.66                        | 69.32                        | 74.95                        | 73.84                        | 75.54                        | 73.18                        | 67.80                        | 63.49                        | 67.97                        | 68.74                        | 67.63                        | 67.98                        |                                             | 68.19 | 73.48 |
| D-306        | ATT0590-TCCCTTTTCCTCCCTCCCT                                                                                                                                                                                                                                                                                                                                                                                       | 78.51                              | 69.80                             | 70.11                        | 69.72                        | 67.22                        | 69.91                        | 67.25                        | 71.64                        | 73.46                        | 71.49                        | 73.79                        | 74.45                        | 72.55                        | 69.29                        | 73.41                        | 73.13                        | 72.76                        | 72.76                        | 71.94                        | 73.58                        |                                             |       |       |
| D-307        | ATT0590-TCCCTTTTCCTCCCTCCCT                                                                                                                                                                                                                                                                                                                                                                                       | 80.22                              | 71.53                             | 74.41                        | 71.36                        | 71.01                        | 71.19                        | 70.99                        | 72.08                        | 72.23                        | 72.00                        | 72.35                        | 73.82                        | 74.52                        | 72.31                        | 74.97                        | 75.18                        | 75.16                        | 74.82                        | 71.91                        | 73.60                        |                                             |       |       |
| D-308        | ATT0590-TCCCTTTTCCTCCCTCCCT                                                                                                                                                                                                                                                                                                                                                                                       | 80.00                              | 71.50                             | 74.39                        | 71.37                        | 70.86                        | 70.95                        | 70.76                        | 71.12                        | 68.71                        | 68.63                        | 68.98                        | 70.85                        | 76.17                        | 74.29                        | 75.93                        | 75.49                        | 74.88                        | 75.24                        | 72.01                        | 73.56                        |                                             |       |       |
| D-309A       | ATT0590-TCCCTTTTCCTCCCTCCCT                                                                                                                                                                                                                                                                                                                                                                                       | 81.13                              | 72.31                             | 75.04                        | 72.2                         | 74.49                        | 73.62                        | 74.77                        | 68.45                        | 69.83                        | 69.39                        | 70.10                        | 72.84                        | 76.88                        | 75.71                        | 77.03                        | 76.58                        | 76.14                        | 76.24                        | 68.37                        | 73.44                        |                                             |       |       |
| D-309B       | ATT0590-TCCCTTTTCCTCCCTCCCT                                                                                                                                                                                                                                                                                                                                                                                       | 80.13                              | 70.77                             | 73.85                        | 70.77                        | 73.92                        | 72.73                        | 74.13                        | 67.40                        | 68.63                        | 68.16                        | 69.01                        | 71.95                        | 77.17                        | 75.73                        | 77.11                        | 74.62                        | 74.77                        | 74.55                        | 67.56                        | 73.50                        |                                             |       |       |
| D-310        | ATT0590-TCCCTTTTCCTCCCTCCCT                                                                                                                                                                                                                                                                                                                                                                                       | 80.31                              | 71.67                             | 73.33                        | 71.52                        | 73.59                        | 72.76                        | 73.73                        | 67.08                        | 68.34                        | 67.75                        | 68.46                        | 71.54                        | 77.35                        | 76.03                        | 77.38                        | 75.01                        | 75.24                        | 75.00                        | 66.29                        | 73.47                        |                                             |       |       |
| D-311        | ATT0590-TCCCTTTTCCTCCCTCCCT                                                                                                                                                                                                                                                                                                                                                                                       | 80.61                              | 72.07                             | 74.08                        | 72.16                        | 74.13                        | 73.40                        | 73.34                        | 67.93                        | 70.00                        | 68.80                        | 69.80                        | 72.61                        | 77.64                        | 76.00                        | 77.66                        | 76.27                        | 77.06                        | 76.56                        | 67.02                        | 73.40                        |                                             |       |       |
| D-312        | ATT0590-TCCCTTTTCCTCCCTCCCT                                                                                                                                                                                                                                                                                                                                                                                       | 80.54                              | 72.26                             | 73.81                        | 72.14                        | 72.09                        | 71.83                        | 72.56                        | 67.54                        | 70.25                        | 68.83                        | 69.88                        | 72.81                        | 77.57                        | 75.89                        | 77.49                        | 76.35                        | 76.85                        | 76.40                        | 67.34                        | 73.53                        |                                             |       |       |
| D-313        | ATT0590-TCCCTTTTCCTCCCTCCCT                                                                                                                                                                                                                                                                                                                                                                                       | 81.98                              | 73.59                             | 75.24                        | 73.52                        | 73.20                        | 72.38                        | 73.43                        | 68.38                        | 70.09                        | 69.93                        | 70.47                        | 71.81                        | 74.14                        | 71.15                        | 74.67                        | 79.49                        | 78.67                        | 78.84                        | 63.55                        | 73.47                        |                                             |       |       |
| D-314        | ATT0590-TCCCTTTTCCTCCCTCCCT                                                                                                                                                                                                                                                                                                                                                                                       | 79.75                              | 76.15                             | 75.20                        | 76.32                        | 71.00                        | 70.92                        | 71.00                        | 66.49                        | 67.75                        | 67.95                        | 67.90                        | 71.03                        | 68.60                        | 72.00                        | 76.97                        | 76.14                        | 76.62                        | 62.74                        | 73.54                        |                              |                                             |       |       |
| D-229        | ATT0590-TCCCTTTTCCTCCCTCCCT                                                                                                                                                                                                                                                                                                                                                                                       | 79.98                              | 75.78                             | 74.53                        | 75.87                        | 70.26                        | 70.68                        | 70.44                        | 66.53                        | 68.07                        | 68.30                        | 68.30                        | 69.83                        | 69.97                        | 68.48                        | 70.36                        | 77.47                        | 76.71                        | 77.33                        | 63.28                        | 73.47                        |                                             |       |       |
| D-230        | ATT0590-TCCCTTTTCCTCCCTCCCT                                                                                                                                                                                                                                                                                                                                                                                       | 79.14                              | 74.02                             | 72.91                        | 74.09                        | 68.45                        | 69.86                        | 68.18                        | 65.52                        | 67.13                        | 67.13                        | 67.48                        | 68.69                        | 68.21                        | 66.43                        | 68.59                        | 76.79                        | 75.76                        | 76.47                        | 61.05                        | 73.40                        |                                             |       |       |
| D-231        | ATT0590-TCCCTTTTCCTCCCTCCCT                                                                                                                                                                                                                                                                                                                                                                                       | 79.49                              | 74.07                             | 72.50                        | 74.09                        | 67.91                        | 69.44                        | 67.8                         | 65.25                        | 66.95                        | 66.95                        | 66.98                        | 68.42                        | 67.98                        | 66.45                        | 68.11                        | 75.93                        | 75.46                        | 76.88                        | 61.02                        | 73.47                        |                                             |       |       |
| D-232        | ATT0590-TCCCTTTTCCTCCCTCCCT                                                                                                                                                                                                                                                                                                                                                                                       | 78.49                              | 73.90                             | 72.96                        | 74.02                        | 67.69                        | 69.10                        | 67.34                        | 64.06                        | 65.46                        | 65.69                        | 65.58                        | 66.98                        | 66.17                        | 64.64                        | 65.93                        | 74.62                        | 74.08                        | 74.43                        | 58.84                        | 73.49                        |                                             |       |       |
| D-233        | ATT0590-TCCCTTTTCCTCCCTCCCT                                                                                                                                                                                                                                                                                                                                                                                       | 78.98                              | 74.21                             | 73.04                        | 74.21                        | 68.90                        | 67.35                        | 64.03                        | 65.43                        | 65.66                        | 65.66                        | 66.67                        | 66.18                        | 65.02                        | 66.30                        | 73.10                        | 72.64                        | 73.15                        | 59.15                        | 73.50                        |                              |                                             |       |       |
| D-234        | ATT0590-TCCCTTTTCCTCCCTCCCT                                                                                                                                                                                                                                                                                                                                                                                       | 79.20                              | 73.14                             | 72.32                        | 73.09                        | 68.21                        | 69.42                        | 67.62                        | 64.43                        | 65.02                        | 65.84                        | 65.37                        | 66.78                        | 65.75                        | 64.72                        | 65.81                        | 73.06                        | 72.39                        | 72.97                        | 57.65                        | 73.36                        |                                             |       |       |
| D-235        | ATT0590-TCCCTTTTCCTCCCTCCCT                                                                                                                                                                                                                                                                                                                                                                                       | 79.81                              | 74.15                             | 73.41                        | 74.03                        | 68.93                        | 70.82                        | 68.61                        | 65.35                        | 66.26                        | 66.85                        | 66.42                        | 67.82                        | 66.83                        | 65.84                        | 66.81                        | 72.01                        | 71.21                        | 71.80                        | 60.45                        | 73.33                        |                                             |       |       |
| D-236        | ATT0590-TCCCTTTTCCTCCCTCCCT                                                                                                                                                                                                                                                                                                                                                                                       | 80.95                              | 73.36                             | 72.93                        | 73.48                        | 70.31                        | 72.19                        | 69.84                        | 66.89                        | 67.62                        | 68.17                        | 67.69                        | 69.30                        | 68.08                        | 67.21                        | 68.15                        | 73.34                        | 72.52                        | 72.87                        | 62.53                        | 73.42                        |                                             |       |       |
| D-315        | ATT0590-TCCCTTTTCCTCCCTCCCT                                                                                                                                                                                                                                                                                                                                                                                       | 78.80                              | 69.47                             | 72.64                        | 69.48                        | 69.79                        | 69.76                        | 68.89                        | 71.68                        | 73.15                        | 73.07                        | 73.96                        | 73.66                        | 69.88                        | 67.14                        | 70.44                        | 73.45                        | 73.17                        | 72.85                        | 69.91                        | 73.56                        |                                             |       |       |
| D-316        | ATT0590-TCCCTTTTCCTCCCTCCCT                                                                                                                                                                                                                                                                                                                                                                                       | 80.34                              | 71.33                             | 74.05                        | 71.12                        | 73.72                        | 72.71                        | 74.12                        | 70.03                        | 74.30                        | 73.90                        | 75.09                        | 75.33                        | 72.34                        | 70.41                        | 72.52                        | 75.1                         | 75.15                        | 74.78                        | 67.65                        | 73.57                        |                                             |       |       |
| D-317        | ATT0590-TCCCTTTTCCTCCCTCCCT                                                                                                                                                                                                                                                                                                                                                                                       | 80.53                              | 71.69                             | 73.43                        | 71.57                        | 72.95                        | 72.37                        | 73.54                        | 69.12                        | 74.30                        | 73.42                        | 74.75                        | 75.55                        | 72.26                        | 70.10                        | 72.44                        | 75.27                        | 75.30                        | 74.96                        | 66.43                        | 73.61                        |                                             |       |       |
| D-318        | ATT0590-TCCCTTTTCCTCCCTCCCT                                                                                                                                                                                                                                                                                                                                                                                       | 80.45                              | 71.92                             | 73.28                        | 71.72                        | 71.20                        | 71.42                        | 68.98                        | 74.09                        | 73.17                        | 74.72                        | 75.49                        | 72.                          |                              |                              |                              |                              |                              |                              |                              |                              |                                             |       |       |

**Supplementary data - table 2. Triplexes with TINA in the AD strand**

Tm data for parallel triplexes with one or two TINAs in the AD strand, base mismatches in the target strand and D-284 as TFO strand. Tm was determined using 1.0 μM of each strand in sodium acetate buffer (50 mM NaOAc, 100 mM NaCl and 10 mM MgCl<sub>2</sub>) at pH 5.0.

All dissociation curves were run with a ramp rate of 3°C/minute. X symbolises TINA.

| Oligo name         | Target sequence                                                                                                                                                                                                                                       | D-200                                  | D-201                                     | D-202                             | D-203                             | D-204                              | D-205                              | D-206                              | D-222                            | D-213                            | D-214                            | D-215                            | D-218                           | D-207                             | D-208                             | D-209                             | D-210                             | D-211                             | D-212                             | D-224                             | Control                           |                                                |       |       |
|--------------------|-------------------------------------------------------------------------------------------------------------------------------------------------------------------------------------------------------------------------------------------------------|----------------------------------------|-------------------------------------------|-----------------------------------|-----------------------------------|------------------------------------|------------------------------------|------------------------------------|----------------------------------|----------------------------------|----------------------------------|----------------------------------|---------------------------------|-----------------------------------|-----------------------------------|-----------------------------------|-----------------------------------|-----------------------------------|-----------------------------------|-----------------------------------|-----------------------------------|------------------------------------------------|-------|-------|
| <b>AD sequence</b> | All triplexes consist of a target sequence (columns) with or without a base mismatch + an antiparallel duplex (AD) sequence with or without TINA (rows) + a triplex forming oligonucleotide (TFO) sequence (D-284: 5' ATTO590-TCCCTTTTCTCCCTCCCT 3'). | 5' ATTO495-AGGGAAAAGAAAGGGAGGGATAAC 3' | ATTO495-AGGCAAAAAGAAAGGGAGGGATAAC         | ATTO495-AGGAAAAAAGAAAGGGAGGGATAAC | ATTO495-AGGTAATAAGAAAGGGAGGGATAAC | ATTO495-AGGGAAACAAGAAAGGGAGGGATAAC | ATTO495-AGGGAAACAAGAAAGGGAGGGATAAC | ATTO495-AGGGAAATAAGAAAGGGAGGGATAAC | ATTO495-AGGGAAAAAGCAGGGAGGGATAAC | ATTO495-AGGGAAAAAGCAGGGAGGGATAAC | ATTO495-AGGGAAAAAGGAGGGAGGGATAAC | ATTO495-AGGGAAAAAGTAGGGAGGGATAAC | ATTO495-AGGGAAAAAGAGGGAGGGATAAC | ATTO495-AGGGAAAAAGAAAGGGAGGGATAAC | Setup and run control<br>D-200 + D-256 + D-284 |       |       |
|                    |                                                                                                                                                                                                                                                       | D-256                                  | 5' GTTATCCCTCCCTTCTTTTCCCT 3'             | 73.51                             | 65.92                             | 65.44                              | 66.14                              | 61.42                              | 63.16                            | 61.12                            | 58.36                            | 60.9                             | 61.03                           | 61.42                             | 62.85                             | 61.72                             | 60.14                             | 61.59                             | 65.76                             | 65.28                             | 65.19                             |                                                | 52.72 |       |
|                    |                                                                                                                                                                                                                                                       | D-445                                  | GTTATCCCTCCCTTCTTTTCCCT <b>X</b>          | 77.07                             | 69.67                             | 69.47                              | 69.65                              | 66.56                              | 68.22                            | 67.18                            | 67.78                            | 67.66                            | 67.02                           | 70.66                             | 70.80                             | 70.18                             | 67.01                             | 67.96                             | 67.38                             | 69.03                             | 65.70                             |                                                | 61.57 | 73.51 |
|                    |                                                                                                                                                                                                                                                       | D-446                                  | GTTATCCCTCCCTTCTTTTCCCT <b>X</b> CT       | 75.01                             | 69.35                             | 68.88                              | 69.83                              | 64.39                              | 66.99                            | 64.47                            | 64.78                            | 64.42                            | 64.54                           | 68.34                             | 68.06                             | 67.81                             | 64.11                             | 65.14                             | 64.53                             | 66.08                             | 63.30                             |                                                | 58.32 | 73.46 |
|                    |                                                                                                                                                                                                                                                       | D-447                                  | GTTATCCCTCCCTTCTTTTCCCT <b>X</b> TTCCCT   | 77.62                             | 68.59                             | 68.8                               | 68.56                              | 69.06                              | 68.77                            | 69.57                            | 66.84                            | 65.78                            | 67.20                           | 71.65                             | 71.22                             | 71.25                             | 66.14                             | 66.38                             | 66.06                             | 67.72                             | 64.27                             |                                                | 61.25 | 73.56 |
|                    |                                                                                                                                                                                                                                                       | D-448                                  | GTTATCCCTCCCTTCTTTTCCCT <b>X</b> TTTTCCCT | 76.85                             | 67.88                             | 67.96                              | 67.85                              | 66.53                              | 66.82                            | 66.58                            | 65.39                            | 64.33                            | 65.64                           | 70.02                             | 68.27                             | 66.02                             | 68.75                             | 68.27                             | 69.54                             | 67.97                             | 65.94                             |                                                | 63.86 | 73.62 |
|                    |                                                                                                                                                                                                                                                       | D-449                                  | GTTATCCCTCC <b>X</b> CTTCTTTTCCCT         | 78.63                             | 71.07                             | 70.95                              | 71.37                              | 67.09                              | 68.99                            | 66.73                            | 73.14                            | 71.86                            | 73.94                           | 71.33                             | 71.22                             | 70.50                             | 65.91                             | 66.17                             | 66.52                             | 67.63                             | 64.41                             |                                                | 60.27 | 73.56 |
|                    |                                                                                                                                                                                                                                                       | D-450                                  | GTTATCCC <b>X</b> TCCCTTCTTTTCCCT         | 80.00                             | 72.77                             | 73.02                              | 73.02                              | 69.03                              | 70.96                            | 68.85                            | 68.50                            | 67.24                            | 68.77                           | 74.41                             | 73.30                             | 74.37                             | 68.00                             | 68.07                             | 68.29                             | 69.36                             | 66.28                             |                                                | 60.99 | 73.50 |
|                    |                                                                                                                                                                                                                                                       | D-451                                  | GTTAT <b>X</b> CCCTCCCTTCTTTTCCCT         | 77.00                             | 69.18                             | 68.76                              | 69.3                               | 65.51                              | 66.93                            | 65.03                            | 65.27                            | 64.19                            | 65.19                           | 69.15                             | 68.55                             | 68.83                             | 64.30                             | 64.71                             | 64.59                             | 65.92                             | 62.85                             |                                                | 57.99 | 73.59 |
|                    |                                                                                                                                                                                                                                                       | D-452                                  | GT <b>X</b> TATCCCTCCCTTCTTTTCCCT         | 74.33                             | 66.45                             | 65.86                              | 66.57                              | 61.62                              | 63.52                            | 61.24                            | 62.16                            | 60.38                            | 61.98                           | 67.60                             | 67.13                             | 67.72                             | 61.01                             | 61.09                             | 61.28                             | 63.14                             | 58.42                             |                                                | 53.19 | 73.59 |
|                    |                                                                                                                                                                                                                                                       | D-498                                  | GTTATCCCTCCCT <b>X</b> TCTTTTCCCT         | 75.29                             | 65.78                             | 66.34                              | 65.64                              | 64.81                              | 65.52                            | 64.92                            | 67.64                            | 65.43                            | 67.94                           | 69.06                             | 68.52                             | 68.18                             | 70.22                             | 68.91                             | 70.81                             | 69.98                             | 66.04                             |                                                | 64.04 | 73.26 |
|                    |                                                                                                                                                                                                                                                       | D-499                                  | GTTATCCCTCCC <b>X</b> TTCTTTTCCCT         | 78.54                             | 69.77                             | 70.89                              | 69.59                              | 69.47                              | 69.71                            | 69.83                            | 75.08                            | 73.86                            | 75.22                           | 73.36                             | 73.31                             | 72.88                             | 70.63                             | 69.33                             | 70.66                             | 71.92                             | 69.86                             |                                                | 70.10 | 73.24 |
|                    |                                                                                                                                                                                                                                                       | D-500                                  | GTTATCCCTCC <b>X</b> CTTCTTTTCCCT         | 80.22                             | 71.84                             | 73.03                              | 71.72                              | 71.96                              | 71.61                            | 72.36                            | 76.31                            | 75.11                            | 76.34                           | 74.32                             | 74.34                             | 73.88                             | 69.12                             | 69.32                             | 69.71                             | 71.30                             | 67.84                             |                                                | 66.65 | 73.36 |
|                    |                                                                                                                                                                                                                                                       | D-501                                  | GTTATCCCTC <b>X</b> CTTCTTTTCCCT          | 79.66                             | 72.38                             | 72.86                              | 72.38                              | 69.05                              | 72.06                            | 72.77                            | 75.32                            | 73.64                            | 75.13                           | 73.52                             | 73.92                             | 73.03                             | 69.24                             | 69.27                             | 69.62                             | 70.81                             | 68.00                             |                                                | 65.16 | 73.27 |
|                    |                                                                                                                                                                                                                                                       | D-502                                  | GTTATCCCT <b>X</b> CCCTTCTTTTCCCT         | 80.61                             | 73.41                             | 73.69                              | 73.12                              | 72.16                              | 71.84                            | 72.43                            | 73.70                            | 72.31                            | 73.62                           | 73.73                             | 73.8                              | 73.56                             | 70.60                             | 70.72                             | 70.94                             | 72.35                             | 69.32                             |                                                | 65.55 | 73.38 |
|                    |                                                                                                                                                                                                                                                       | D-503                                  | GTTATCC <b>X</b> CTCCCTTCTTTTCCCT         | 79.53                             | 74.76                             | 74.10                              | 75.05                              | 70.18                              | 72.38                            | 70.36                            | 69.38                            | 68.70                            | 69.53                           | 73.97                             | 73.13                             | 73.60                             | 69.32                             | 69.35                             | 69.70                             | 70.30                             | 68.05                             |                                                | 64.30 | 73.48 |

**Supplementary data - table 3. Triplexes with TINA in the AD and the TFO strand**  
 Tm data for parallel triplexes with one or two TINAs in the AD strand, one or two TINAs in the TFO strand and D-200 as target strand. Triplex Tm was determined using 1.0 µM of each strand in sodium acetate buffer (50 mM NaOAc, 100 mM NaCl and 10 mM MgCl<sub>2</sub>) at pH 5.0. All dissociation curves were run with a ramp rate of 3°C/minute. X symbolises TINA.

| Oligo name   | AD sequence                                                                                                                                                                                                                                  | D-256                           | D-445                      | D-446                     | D-447                     | D-448                     | D-449                     | D-450                     | D-451                     | D-452                     | D-498                     | D-499                     | D-500                     | D-501                     | D-502                     | D-503                     |
|--------------|----------------------------------------------------------------------------------------------------------------------------------------------------------------------------------------------------------------------------------------------|---------------------------------|----------------------------|---------------------------|---------------------------|---------------------------|---------------------------|---------------------------|---------------------------|---------------------------|---------------------------|---------------------------|---------------------------|---------------------------|---------------------------|---------------------------|
| TFO sequence | All triplexes consist of a target sequence (D-200: 5' ATTO495-AGGGAAAAGAAGGGAGGGATAAC) + an antiparallel duplex (AD) sequence with or without TINA (columns) + a triplex forming oligonucleotide (TFO) sequence with or without TINA (rows). | 5' GTTATCCCTCCCTCTTTCCTTCCCT 3' | GTTATCCCTCCCTCTTTCCTTCCCTX | GTTATCCCTCCCTCTTTCCTTCCCT |
|              |                                                                                                                                                                                                                                              |                                 |                            |                           |                           |                           |                           |                           |                           |                           |                           |                           |                           |                           |                           |                           |
| LC D-284     | 5' ATTO590-TCCCTTTTCTTCCCTCCCT 3'                                                                                                                                                                                                            | 73.51                           | 77.15                      | 75.09                     | 77.64                     | 76.70                     | 78.65                     | 79.92                     | 77.07                     | 74.45                     | 75.61                     | 78.65                     | 80.37                     | 79.79                     | 80.73                     | 79.63                     |
| LC D-285     | ATTO590-XTCCCTTTTCTTCCCTCCCT                                                                                                                                                                                                                 | 75.03                           | 77.55                      | 77.03                     | 79.66                     | 78.34                     | 80.37                     | 81.52                     | 78.55                     | 76.03                     | 77.43                     | 80.58                     | 82.15                     | 81.60                     | 82.44                     | 81.29                     |
| LC D-286     | ATTO590-TXCCCTTTTCTTCCCTCCCT                                                                                                                                                                                                                 | 74.07                           | 77.26                      | 75.93                     | 78.56                     | 77.69                     | 79.76                     | 80.96                     | 77.79                     | 75.3                      | 76.58                     | 79.92                     | 81.53                     | 80.84                     | 81.76                     | 80.59                     |
| LC D-287     | ATTO590-TCXCCTTTTCTTCCCTCCCT                                                                                                                                                                                                                 | 74.18                           | 77.59                      | 74.00                     | 77.62                     | 77.10                     | 79.15                     | 80.36                     | 77.48                     | 74.85                     | 75.77                     | 79.09                     | 80.81                     | 80.01                     | 80.84                     | 78.61                     |
| LC D-288     | ATTO590-TCCXCCTTTTCTTCCCTCCCT                                                                                                                                                                                                                | 74.18                           | 77.75                      | 73.03                     | 76.78                     | 76.67                     | 78.62                     | 79.91                     | 77.22                     | 74.75                     | 74.93                     | 78.38                     | 79.87                     | 79.48                     | 79.95                     | 77.55                     |
| LC D-289     | ATTO590-TCCCXTTTTCTTCCCTCCCT                                                                                                                                                                                                                 | 75.61                           | 79.19                      | 76.36                     | 77.05                     | 77.14                     | 79.25                     | 80.79                     | 78.22                     | 76.20                     | 75.30                     | 78.5                      | 79.98                     | 79.25                     | 78.97                     | 80.56                     |
| LC D-290     | ATTO590-TCCCTXTTTTCTTCCCTCCCT                                                                                                                                                                                                                | 78.16                           | 81.26                      | 78.58                     | 77.42                     | 78.71                     | 80.91                     | 82.39                     | 80.43                     | 78.69                     | 76.49                     | 79.57                     | 80.93                     | 79.40                     | 76.42                     | 82.39                     |
| LC D-291     | ATTO590-TCCCTTXXTTTCTTCCCTCCCT                                                                                                                                                                                                               | 78.39                           | 81.50                      | 78.75                     | 72.82                     | 78.96                     | 81.02                     | 82.53                     | 80.74                     | 78.92                     | 76.38                     | 80.04                     | 80.61                     | 76.08                     | 81.05                     | 82.62                     |
| LC D-292     | ATTO590-TCCCTTTTXXCTTCCCTCCCT                                                                                                                                                                                                                | 79.46                           | 82.37                      | 79.95                     | 78.58                     | 79.89                     | 81.63                     | 83.21                     | 81.70                     | 80.00                     | 77.29                     | 79.87                     | 76.6                      | 80.23                     | 82.12                     | 83.40                     |
| LC D-293     | ATTO590-TCCCTTTTXXCTTCCCTCCCT                                                                                                                                                                                                                | 78.92                           | 81.16                      | 79.57                     | 79.38                     | 78.11                     | 80.96                     | 82.58                     | 80.94                     | 79.36                     | 75.26                     | 75.04                     | 80.28                     | 80.58                     | 81.68                     | 83.00                     |
| LC D-294     | ATTO590-TCCCTTTTXXCTTCCCTCCCT                                                                                                                                                                                                                | 78.26                           | 80.43                      | 79.29                     | 79.21                     | 74.38                     | 80.48                     | 82.08                     | 80.38                     | 78.74                     | 72.87                     | 79.27                     | 81.38                     | 80.11                     | 81.68                     | 82.99                     |
| LC D-295     | ATTO590-TCCCTTTTCTXXTCCCTCCCT                                                                                                                                                                                                                | 79.31                           | 81.51                      | 80.25                     | 80.95                     | 79.13                     | 81.23                     | 82.93                     | 81.50                     | 79.78                     | 72.21                     | 79.31                     | 81.73                     | 81.44                     | 82.63                     | 83.66                     |
| LC D-296     | ATTO590-TCCCTTTTCTTXXCCTCCCT                                                                                                                                                                                                                 | 78.84                           | 80.83                      | 79.84                     | 81.03                     | 79.28                     | 79.96                     | 82.47                     | 81.28                     | 79.40                     | 76.05                     | 75.03                     | 80.70                     | 81.09                     | 82.43                     | 83.49                     |
| LC D-297     | ATTO590-TCCCTTTTCTTXXCCTCCCT                                                                                                                                                                                                                 | 78.29                           | 80.17                      | 79.31                     | 80.75                     | 78.96                     | 76.76                     | 82.01                     | 80.70                     | 78.77                     | 77.36                     | 79.84                     | 77.97                     | 80.49                     | 82.07                     | 82.99                     |
| LC D-298     | ATTO590-TCCCTTTTCTTCCXCTCCCT                                                                                                                                                                                                                 | 78.31                           | 80.41                      | 79.37                     | 80.96                     | 79.66                     | 80.68                     | 81.90                     | 80.73                     | 78.88                     | 77.51                     | 80.88                     | 81.44                     | 79.19                     | 81.83                     | 83.01                     |
| LC D-299     | ATTO590-TCCCTTTTCTTCCXCTCCCT                                                                                                                                                                                                                 | 78.15                           | 80.32                      | 79.25                     | 80.71                     | 79.23                     | 81.66                     | 80.08                     | 80.51                     | 78.49                     | 77.61                     | 80.29                     | 82.28                     | 81.68                     | 79.39                     | 82.77                     |
| LC D-300     | ATTO590-TCCCTTTTCTTCCCTXXCCT                                                                                                                                                                                                                 | 79.09                           | 81.71                      | 80.70                     | 81.85                     | 80.46                     | 82.16                     | 76.83                     | 81.64                     | 79.89                     | 78.53                     | 81.49                     | 82.94                     | 83.01                     | 83.14                     | 82.77                     |
| LC D-301     | ATTO590-TCCCTTTTCTTCCCTXXCCT                                                                                                                                                                                                                 | 76.97                           | 79.88                      | 78.84                     | 80.76                     | 79.42                     | 81.47                     | 81.85                     | 79.14                     | 77.79                     | 77.39                     | 80.32                     | 82.19                     | 81.99                     | 83.17                     | 80.74                     |
| LC D-302     | ATTO590-TCCCTTTTCTTCCCTXXCT                                                                                                                                                                                                                  | 77.64                           | 80.19                      | 79.10                     | 81.18                     | 79.80                     | 81.47                     | 82.5                      | 78.61                     | 77.72                     | 77.79                     | 80.72                     | 82.31                     | 82.10                     | 83.20                     | 83.19                     |
| LC D-303     | ATTO590-TCCCTTTTCTTCCCTXXCT                                                                                                                                                                                                                  | 77.94                           | 80.87                      | 79.81                     | 81.59                     | 80.25                     | 81.77                     | 82.71                     | 79.06                     | 77.87                     | 78.27                     | 81.02                     | 82.55                     | 82.45                     | 83.54                     | 84.12                     |
| LC D-304     | ATTO590-TCCCTTTTCTTCCCTXXCT                                                                                                                                                                                                                  | 78.36                           | 81.31                      | 80.16                     | 81.92                     | 80.62                     | 82.10                     | 82.75                     | 79.99                     | 77.74                     | 78.71                     | 81.30                     | 82.93                     | 82.57                     | 83.71                     | 83.94                     |
|              | Setup and run control D-200 + D-256 + D-284                                                                                                                                                                                                  |                                 | 73.50                      | 73.48                     | 73.44                     | 73.56                     | 73.50                     | 73.52                     | 73.55                     | 73.59                     | 73.56                     | 73.53                     | 73.56                     | 73.47                     | 73.59                     | 73.56                     |
| LC D-284     | 5' ATTO590-TCCCTTTTCTTCCCTCCCT 3'                                                                                                                                                                                                            | 73.51                           | 77.08                      | 75.22                     | 77.71                     | 76.90                     | 78.75                     | 80.22                     | 76.97                     | 74.39                     | 75.91                     | 78.72                     | 80.48                     | 79.77                     | 80.67                     | 79.6                      |
| LC D-305     | ATTO590-TCCCTTTTCTTXXCCTCCCT                                                                                                                                                                                                                 | 75.66                           | 78.38                      | 77.13                     | 76.69                     | 73.13                     | 77.13                     | 79.29                     | 77.38                     | 75.96                     | 69.62                     | 74.34                     | 77.88                     | 77.28                     | 79.47                     | 80.67                     |
| LC D-306     | ATTO590-TCCCTTTTCTTXXCCTCCCT                                                                                                                                                                                                                 | 78.51                           | 81.89                      | 80.19                     | 79.30                     | 75.43                     | 78.28                     | 81.54                     | 80.47                     | 79.10                     | 72.73                     | 73.67                     | 79.16                     | 79.19                     | 80.96                     | 82.86                     |
| LC D-307     | ATTO590-TCCCTTTTCTTXXCCTCCCT                                                                                                                                                                                                                 | 80.22                           | 83.86                      | 81.44                     | 81.04                     | 79.12                     | 79.99                     | 82.97                     | 81.96                     | 80.72                     | 74.96                     | 70.61                     | 79.63                     | 81.08                     | 82.14                     | 84.13                     |
| LC D-308     | ATTO590-TCCCTTTTCTTXXCCTCCCT                                                                                                                                                                                                                 | 80.00                           | 83.48                      | 81.35                     | 80.98                     | 79.09                     | 77.38                     | 82.67                     | 81.84                     | 80.46                     | 76.59                     | 76.00                     | 77.26                     | 80.52                     | 81.89                     | 84.04                     |
| LC D-309A    | ATTO590-TCCCTTTTCTTXXCCTCCCT                                                                                                                                                                                                                 | 81.13                           | 84.89                      | 82.15                     | 81.09                     | 80.66                     | 78.48                     | 83.70                     | 82.79                     | 81.51                     | 78.34                     | 80.52                     | 74.11                     | 80.85                     | 82.82                     | 84.96                     |
| LC D-309B    | ATTO590-TCCCTTTTCTTXXCCTCCCT                                                                                                                                                                                                                 | 80.13                           | 83.72                      | 81.24                     | 80.15                     | 80.37                     | 81.20                     | 82.49                     | 81.93                     | 80.57                     | 77.74                     | 81.12                     | 77.32                     | 79.12                     | 81.95                     | 84.01                     |
| LC D-310     | ATTO590-TCCCTTTTCTTXXCCTCCCT                                                                                                                                                                                                                 | 80.31                           | 84.06                      | 81.29                     | 75.78                     | 80.25                     | 81.45                     | 82.86                     | 82.02                     | 80.84                     | 77.82                     | 81.72                     | 81.45                     | 75.09                     | 82.09                     | 84.44                     |
| LC D-311     | ATTO590-TCCCTTTTCTTXXCCTCCCT                                                                                                                                                                                                                 | 80.61                           | 84.75                      | 81.71                     | 76.14                     | 80.51                     | 82.78                     | 81.78                     | 82.47                     | 81.20                     | 78.51                     | 81.62                     | 82.74                     | 78.28                     | 80.44                     | 84.54                     |
| LC D-312     | ATTO590-TCCCTTTTCTTXXCCTCCCT                                                                                                                                                                                                                 | 80.54                           | 84.34                      | 81.70                     | 80.60                     | 80.24                     | 82.77                     | 81.75                     | 82.38                     | 80.90                     | 78.21                     | 81.37                     | 83.01                     | 81.58                     | 75.61                     | 84.54                     |
| LC D-313     | ATTO590-TCCCTTTTCTTXXCCTCCCT                                                                                                                                                                                                                 | 81.98                           | 85.85                      | 83.34                     | 81.93                     | 81.67                     | 83.40                     | 79.67                     | 83.45                     | 82.59                     | 79.55                     | 82.48                     | 83.84                     | 82.96                     | 80.11                     | 84.93                     |
| LC D-314     | ATTO590-TCCCXTTTTCTTCCCTXXCCT                                                                                                                                                                                                                | 79.75                           | 83.81                      | 81.23                     | 81.64                     | 80.42                     | 82.18                     | 77.65                     | 82.04                     | 80.46                     | 78.19                     | 81.26                     | 82.80                     | 82.60                     | 82.24                     | 83.51                     |
| LC D-229     | ATTO590-TCCCXTTTTCTTCCCTXXCCT                                                                                                                                                                                                                | 79.98                           | 84.16                      | 81.67                     | 81.95                     | 80.75                     | 82.84                     | 83.58                     | 81.90                     | 80.79                     | 78.46                     | 81.53                     | 83.30                     | 82.72                     | 83.27                     | 83.07                     |
| LC D-230     | ATTO590-TCCXCCTTTTCTTCCCTXXCCT                                                                                                                                                                                                               | 79.14                           | 83.11                      | 77.26                     | 81.67                     | 80.44                     | 82.35                     | 83.13                     | 81.41                     | 79.91                     | 78.17                     | 81.12                     | 83.00                     | 82.75                     | 83.81                     | 79.87                     |
| LC D-231     | ATTO590-TCCXCCTTTTCTTCCCTXXCT                                                                                                                                                                                                                | 79.49                           | 83.42                      | 77.17                     | 81.91                     | 80.71                     | 82.27                     | 83.73                     | 80.82                     | 79.84                     | 78.57                     | 81.41                     | 82.95                     | 82.89                     | 83.69                     | 82.83                     |
| LC D-232     | ATTO590-TCCXCCTTTTCTTCCCTXXCT                                                                                                                                                                                                                | 78.49                           | 81.63                      | 78.48                     | 82.14                     | 80.8                      | 82.44                     | 83.66                     | 80.46                     | 79.28                     | 78.55                     | 81.36                     | 83.32                     | 83.13                     | 84.08                     | 83.55                     |
| LC D-233     | ATTO590-TCCXCCTTTTCTTCCCTXXCT                                                                                                                                                                                                                | 78.98                           | 81.87                      | 78.85                     | 82.38                     | 81.13                     | 82.69                     | 83.93                     | 80.49                     | 79.09                     | 78.70                     | 81.66                     | 83.47                     | 83.02                     | 84.43                     | 84.53                     |
| LC D-234     | ATTO590-TCCXCCTTTTCTTCCCTXXCT                                                                                                                                                                                                                | 79.20                           | 80.66                      | 81.18                     | 83.47                     | 81.95                     | 83.58                     | 84.72                     | 81.41                     | 79.84                     | 79.63                     | 82.34                     | 84.25                     | 83.94                     | 85.26                     | 86.04                     |
| LC D-235     | ATTO590-TCCXCCTTTTCTTCCCTXXCT                                                                                                                                                                                                                | 79.81                           | 80.98                      | 81.53                     | 83.77                     | 82.35                     | 83.72                     | 84.82                     | 82.15                     | 79.76                     | 79.96                     | 82.81                     | 84.52                     | 84.18                     | 85.10                     | 85.46                     |
| LC D-236     | ATTO590-TCCXCCTTTTCTTCCCTXXCT                                                                                                                                                                                                                | 80.95                           | 81.43                      | 82.22                     | 84.23                     | 82.86                     | 84.24                     | 85.25                     | 83.10                     | 80.94                     | 80.79                     | 83.28                     | 84.87                     | 84.68                     | 85.79                     | 85.85                     |
|              | Setup and run control D-200 + D-256 + D-284                                                                                                                                                                                                  |                                 | 73.44                      | 73.52                     | 73.65                     | 73.56                     | 73.45                     | 73.59                     | 73.56                     | 73.56                     | 73.59                     | 73.50                     | 73.59                     | 73.62                     | 73.56                     | 73.50                     |

**Supplementary data - table 4. TFOs with different length and number of TINAs**

T<sub>m</sub> data for parallel triplexes with different TFO lengths and zero to three TINAs, base mismatches in the target strand and D-256 as AD strand. T<sub>m</sub> for parallel triplexes and parallel duplexes was determined using 1.0 μM of each strand in sodium acetate buffer (50 mM NaOAc, 100 mM NaCl and 10 mM MgCl<sub>2</sub>) at pH 4.5. For each run a setup control was included. This control consisted of D-256, D-284 and D-200 to D-206 in sodium acetate buffer at pH 5.0 and are comparable with data from supplementary data table 1. X symbolises TINA. All dissociation curves were run with a ramp rate of 3°C/minute.

| Oligo name          | Target sequence                                                                                                                                                                                                                                                      | D-200                                  | D-201                             | D-202                                     | D-203                                     | D-204                                    | D-205                                    | D-206                                    |       |
|---------------------|----------------------------------------------------------------------------------------------------------------------------------------------------------------------------------------------------------------------------------------------------------------------|----------------------------------------|-----------------------------------|-------------------------------------------|-------------------------------------------|------------------------------------------|------------------------------------------|------------------------------------------|-------|
| <b>TFO sequence</b> | All triplexes consist of a target sequence (columns) with or without base mismatch + an antiparallel duplex (AD) sequence (D-256: 5' GTTATCCCTCCCTTCTTTCCCT 3') + a triplex forming oligonucleotide (TFO) sequence with different length and number of TINAs (rows). | 5' ATTO495-AGGGAAAAGAAAGGGAGGGATAAC 3' | ATTO495-AGGC AAAAGAAAGGGAGGGATAAC | ATTO495-AGG <b>A</b> AAAAGAAAGGGAGGGATAAC | ATTO495-AGG <b>T</b> AAAAGAAAGGGAGGGATAAC | ATTO495-AGGGAA <b>C</b> AGAAGGGAGGGATAAC | ATTO495-AGGGAA <b>G</b> AGAAGGGAGGGATAAC | ATTO495-AGGGAA <b>T</b> AGAAGGGAGGGATAAC |       |
| LC D-284            | ATTO590-TCCCTTTTCTTCCCTCCCT                                                                                                                                                                                                                                          | 83.87                                  | 75.55                             | 75.23                                     | 75.44                                     | 72.50                                    | 74.23                                    | 72.08                                    |       |
| LC D-407            | ATTO590-TCCCTTTTCTTCCCTC                                                                                                                                                                                                                                             | 77.73                                  | 65.77                             | 64.04                                     | 65.92                                     | 62.04                                    | 63.75                                    | 61.08                                    |       |
| LC D-408            | ATTO590-TCCCTTTTCTTCC                                                                                                                                                                                                                                                | 67.86                                  | 51.05                             | 45.68                                     | 51.20                                     | 48.50                                    | 52.11                                    | 49.43                                    |       |
| LC D-409            | ATTO590-TCCCTTTTCT                                                                                                                                                                                                                                                   | 57.87                                  | 38.95                             | 38.51                                     | 39.10                                     | 39.54                                    | 38.43                                    | 38.78                                    |       |
| LC D-464            | ATTO590-TCCCTTTTC                                                                                                                                                                                                                                                    | 50.82                                  |                                   |                                           |                                           |                                          |                                          |                                          |       |
| LC D-461            | ATTO590-TCCCTTTT                                                                                                                                                                                                                                                     | 39.90                                  |                                   |                                           |                                           |                                          |                                          |                                          |       |
| LC D-304            | ATTO590-TCCCTTTTCTTCCCTCCCT <b>X</b>                                                                                                                                                                                                                                 | 86.73                                  | 78.32                             | 78.47                                     | 78.08                                     | 75.41                                    | 77.28                                    | 75.33                                    |       |
| LC D-589            | ATTO590-TCCCTTTTCTTCCCTC <b>X</b>                                                                                                                                                                                                                                    | 82.84                                  | 71.71                             | 71.01                                     | 71.57                                     | 68.85                                    | 71.06                                    | 68.27                                    |       |
| LC D-588            | ATTO590-TCCCTTTTCTTCC <b>X</b>                                                                                                                                                                                                                                       | 74.12                                  | 60.94                             | 57.22                                     | 61.23                                     | 53.70                                    | 56.44                                    | 52.47                                    |       |
| LC D-467            | ATTO590-TCCCTTTTCT <b>X</b>                                                                                                                                                                                                                                          | 64.48                                  | 46.41                             |                                           |                                           | 44.97                                    | 46.53                                    | 41.35                                    | 42.37 |
| LC D-465            | ATTO590-TCCCTTTTC <b>X</b>                                                                                                                                                                                                                                           | 58.49                                  |                                   |                                           |                                           | 39.95                                    | 40.06                                    |                                          |       |
| LC D-462            | ATTO590-TCCCTTTT <b>X</b>                                                                                                                                                                                                                                            | 50.27                                  |                                   |                                           |                                           | 40.13                                    | 39.85                                    | 39.55                                    |       |
| LC D-459            | ATTO590-TCCCTTT <b>X</b>                                                                                                                                                                                                                                             | 47.83                                  |                                   |                                           |                                           | 42.37                                    | 42.36                                    | 42.53                                    |       |
| LC D-236            | ATTO590- <b>X</b> TCCCTTTTCTTCCCTCCCT <b>X</b>                                                                                                                                                                                                                       | 88.31                                  | 79.84                             | 80.02                                     | 79.75                                     | 77.49                                    | 79.16                                    | 77.64                                    |       |
| LC D-587            | ATTO590- <b>X</b> TCCCTTTTCTTCCCTC <b>X</b>                                                                                                                                                                                                                          | 85.29                                  | 74.59                             | 74.33                                     | 74.42                                     | 71.65                                    | 73.75                                    | 71.18                                    |       |
| LC D-586            | ATTO590- <b>X</b> TCCCTTTTCTTCC <b>X</b>                                                                                                                                                                                                                             | 77.70                                  | 63.17                             | 61.54                                     | 63.57                                     | 57.67                                    | 60.23                                    | 58.61                                    |       |
| LC D-585            | ATTO590- <b>X</b> TCCCTTTTCT <b>X</b>                                                                                                                                                                                                                                | 68.84                                  | 49.92                             | 46.19                                     | 50.89                                     | 49.68                                    | 52.59                                    | 49.66                                    |       |
| LC D-514            | ATTO590- <b>X</b> TCCCTTTTC <b>X</b>                                                                                                                                                                                                                                 | 66.49                                  | 41.14                             |                                           |                                           | 41.64                                    | 48.30                                    | 47.34                                    |       |
| LC D-512            | ATTO590- <b>X</b> TCCCTTTT <b>X</b>                                                                                                                                                                                                                                  | 64.45                                  |                                   |                                           |                                           | 51.24                                    | 46.01                                    |                                          |       |
| LC D-509            | ATTO590- <b>X</b> TCCCTTT <b>X</b>                                                                                                                                                                                                                                   | 64.30                                  |                                   |                                           |                                           | 54.77                                    | 51.77                                    | 59.11                                    |       |
| LC D-584            | ATTO590- <b>X</b> TCCCTTTTCT <b>X</b> TCCCTCCCT <b>X</b>                                                                                                                                                                                                             | 88.36                                  | 78.36                             | 79.61                                     | 78.29                                     | 77.79                                    | 79.65                                    | 77.66                                    |       |
| LC D-583            | ATTO590- <b>X</b> TCCCTTTTCT <b>X</b> TCCCTCCC <b>X</b>                                                                                                                                                                                                              | 88.84                                  | 79.34                             | 80.32                                     | 79.25                                     | 78.53                                    | 80.23                                    | 78.39                                    |       |
| LC D-582            | ATTO590- <b>X</b> TCCCTTTTCT <b>X</b> TCCCTC <b>X</b>                                                                                                                                                                                                                | 86.90                                  | 75.31                             | 79.73                                     | 75.23                                     | 76.77                                    | 76.71                                    | 76.68                                    |       |
| LC D-581            | ATTO590- <b>X</b> TCCCTTTTCT <b>X</b> TCCC <b>X</b>                                                                                                                                                                                                                  | 84.57                                  | 70.54                             | 74.90                                     | 70.61                                     | 76.41                                    | 74.87                                    | 76.32                                    |       |
| LC D-580            | ATTO590- <b>X</b> TCCCTTTTCT <b>X</b> TCTC <b>X</b>                                                                                                                                                                                                                  | 81.79                                  | 64.17                             | 65.63                                     | 64.44                                     | 69.71                                    | 67.28                                    | 69.04                                    |       |
| LC D-470            | ATTO590- <b>X</b> TCCCTTTTCT <b>X</b>                                                                                                                                                                                                                                | 76.27                                  | 56.98                             | 59.79                                     | 56.27                                     |                                          |                                          |                                          |       |
| LC D-515            | ATTO590- <b>X</b> TCCCTTTTCT <b>X</b>                                                                                                                                                                                                                                | 70.51                                  | 43.90                             | 45.22                                     | 44.40                                     | 52.71                                    | 53.24                                    | 55.65                                    |       |
| LC D-513            | ATTO590- <b>X</b> TCCCCTTTT <b>X</b>                                                                                                                                                                                                                                 | 64.17                                  | 42.96                             | 48.19                                     | 43.34                                     | 51.89                                    | 45.99                                    |                                          |       |
| LC D-579            | ATTO590- <b>X</b> TCCCCTTTT <b>X</b>                                                                                                                                                                                                                                 | 58.91                                  | 40.61                             | 42.08                                     | 40.52                                     | 53.55                                    | 48.22                                    | 55.02                                    |       |
| Control             | Setup and run control D-256 + D-284 + D-200 to D-206 at pH 5.0                                                                                                                                                                                                       | 73.43                                  | 65.84                             | 64.92                                     | 65.68                                     | 61.08                                    | 62.87                                    | 60.76                                    |       |

**Supplementary data - table 5. LightCycler ramp rate and influence on Tm determinations**

Tm data for parallel triplexes from table 1 determined using 1.0 μM of each strand in sodium acetate buffer (50 mM NaOAc, 100 mM NaCl and 10 mM MgCl<sub>2</sub>) at pH 5.0. X symbolises TINA. Shattered boxes symbolises that Tm could not be determined. The basic LightCycler programs are described below.

**Basic LightCycler2.0 dissociation program**

- 1) Heating to 90°C at a ramp rate of 0.2°C/second and hold for 15 seconds.
- 2) Cooling to 37°C at a ramp rate of 0.2°C/second and hold for Y minutes before
- 3) Heating to 90°C at a ramp rate of 0.05°C/second and continuous measurements or heating with a ramp rate of 0.05°C/second with hold for Z seconds before single measurements (one measurement per °C).

**Basic LightCycler2.0 annealing program**

- 1) Heating to 90°C at a ramp rate of 0.2°C/second and hold for Y minutes.
- 2) Cooling to 37°C at a ramp rate of 0.05°C/second and continuous measurements or cooling with a ramp rate of 0.05°C/second with hold for Z seconds before single measurements (one measurement per °C).

| LightCycler program type<br>ramp rate (°C/minute) | Dissociation |    |     |     | Annealing |    |     |     |
|---------------------------------------------------|--------------|----|-----|-----|-----------|----|-----|-----|
|                                                   | 3            | 1  | 0.5 | 0.2 | 3         | 1  | 0.5 | 0.2 |
| Y (minutes)                                       | 5            | 30 | 30  | 30  | 5         | 10 | 10  | 10  |
| Z (seconds)                                       | none         | 40 | 100 | 280 | none      | 40 | 100 | 280 |

| TFO sequence | LightCycler2.0 program. Influence of ramp rate on determination of Tm. All triplexes consist of D-200 (5' ATTO495-AGGGAAAAGAAGGGAGGGATAAC 3') as target sequence with D-256 (5' GTTATCCCTCCCTTCTTTCCCT 3') as antiparallel duplex strand (AD) and different triplex forming oligonucleotides (TFOs) | Dissociation ramp rate<br>3°C/minute | Dissociation ramp rate | Dissociation ramp rate | Dissociation ramp rate | Annealing ramp rate | Annealing ramp rate | Annealing ramp rate | Annealing ramp rate |
|--------------|-----------------------------------------------------------------------------------------------------------------------------------------------------------------------------------------------------------------------------------------------------------------------------------------------------|--------------------------------------|------------------------|------------------------|------------------------|---------------------|---------------------|---------------------|---------------------|
|              |                                                                                                                                                                                                                                                                                                     |                                      | 1°C/minute             | 0.5°C/minute           | 0.2°C/minute           | 3°C/minute          | 1°C/minute          | 0.5°C/minute        | 0.2°C/minute        |
| LC D-284     | ATTO590-TCCCTTTTCTTCCCTCCCT                                                                                                                                                                                                                                                                         | 73.49                                | 71.23                  | 70.81                  | 70.43                  | 68.31               | 69.48               | 69.80               | 69.80               |
| LC D-293     | ATTO590-TCCCTTTT <b>X</b> CTTCCCTCCCT                                                                                                                                                                                                                                                               | 78.71                                | 76.11                  | 74.89                  | 73.37                  | 66.74               | 68.37               | 69.51               | 70.69               |
| LC D-294     | ATTO590-TCCCTTTT <b>CX</b> TTCCCTCCCT                                                                                                                                                                                                                                                               | 78.24                                | 75.32                  | 74.13                  | 72.61                  | 66.36               | 68.14               | 69.29               | 70.23               |
| LC D-295     | ATTO590-TCCCTTTT <b>CTX</b> TCCCTCCCT                                                                                                                                                                                                                                                               | 79.18                                | 76.55                  | 75.21                  | 73.69                  | 66.76               | 68.60               | 69.74               | 70.89               |
| LC D-297     | ATTO590-TCCCTTTT <b>CTTCX</b> CTCCCT                                                                                                                                                                                                                                                                | 78.12                                | 75.00                  | 73.8                   | 72.39                  | 66.78               | 68.83               | 69.86               | 70.66               |
| LC D-299     | ATTO590-TCCCTTTT <b>CTTCCX</b> CTCCCT                                                                                                                                                                                                                                                               | 77.87                                | 74.89                  | 73.58                  | 72.50                  | 67.38               | 69.40               | 70.32               | 71.12               |
| LC D-300     | ATTO590-TCCCTTTT <b>CTTCCCTX</b> CCCT                                                                                                                                                                                                                                                               | 78.95                                | 76.08                  | 74.93                  | 73.44                  | 67.85               | 69.86               | 70.89               | 71.84               |
| LC D-301     | ATTO590-TCCCTTTT <b>CTTCCCTC</b> XCT                                                                                                                                                                                                                                                                | 76.61                                | 73.72                  | 72.72                  | 71.83                  | 67.73               | 69.51               | 70.38               | 70.78               |
| LC D-304     | ATTO590-TCCCTTTT <b>CTTCCCTCCCTX</b>                                                                                                                                                                                                                                                                | 78.20                                | 75.21                  | 74.74                  | 73.15                  | 69.11               | 70.89               | 71.77               | 72.38               |
| LC D-305     | ATTO590-TCCCTTTT <b>CXTX</b> TCCCTCCCT                                                                                                                                                                                                                                                              | 75.46                                | 72.62                  | 71.47                  | 70.22                  | 60.82               | 66.42               | 66.53               | 68.02               |
| LC D-307     | ATTO590-TCCCTTTT <b>XCTT</b> XCCCTCCCT                                                                                                                                                                                                                                                              | 80.32                                | 77.82                  | 76.73                  | 75.10                  | 62.08               | 66.87               | 67.10               | 69.20               |
| LC D-309A    | ATTO590-TCCCTTTT <b>XCTT</b> CXCTCCCT                                                                                                                                                                                                                                                               | 81.05                                | 78.58                  | 77.49                  | 76.08                  | 63.16               | 67.22               | 67.79               | 69.78               |
| LC D-310     | ATTO590-TCCCTTT <b>XTTCTT</b> CCXCTCCCT                                                                                                                                                                                                                                                             | 80.34                                | 77.71                  | 76.52                  | 75.00                  | 62.23               | 66.53               | 67.79               | 69.32               |
| LC D-313     | ATTO590-TCCCT <b>XTTTCTT</b> CCCTXCCT                                                                                                                                                                                                                                                               | 81.80                                | 79.12                  | 78.17                  | 76.41                  | 64.48               | 67.56               | 68.60               | 70.46               |
| LC D-231     | ATTO590-TCC <b>XCTTTTCTT</b> CCCTCCXCT                                                                                                                                                                                                                                                              | 79.31                                | 76.36                  | 75.21                  | 73.69                  | 67.63               | 69.29               | 70.43               | 71.50               |
| LC D-236     | ATTO590- <b>X</b> TCCCTTTTCTTCCCTCCCT <b>X</b>                                                                                                                                                                                                                                                      | 80.96                                | 78.13                  | 76.87                  | 75.44                  | 69.93               | 71.58               | 72.50               | 73.22               |
| LC D-341     | ATTO590-TCCCTTTTCTTCCCTCC <b>CTX</b>                                                                                                                                                                                                                                                                | 76.97                                | 73.88                  | 72.94                  | 72.04                  | 68.56               | 70.23               | 70.86               | 71.24               |
| LC D-343     | ATTO590-TCCCTTTTCTTCCCT <b>CXCTX</b>                                                                                                                                                                                                                                                                | 80.16                                | 77.55                  | 76.16                  | 74.55                  | 68.21               | 70.35               | 71.21               | 72.19               |
| LC D-344     | ATTO590-TCCCTTTTCTTCCCT <b>XCCCTX</b>                                                                                                                                                                                                                                                               | 81.83                                | 79.12                  | 77.93                  | 76.31                  | 67.51               | 69.63               | 70.66               | 72.19               |
| LC D-346     | ATTO590-TCCCTTTTCTTCC <b>XCT</b> CCCT <b>X</b>                                                                                                                                                                                                                                                      | 82.34                                | 79.65                  | 78.48                  | 76.86                  | 67.60               | 69.78               | 70.78               | 72.19               |
| LC D-347     | ATTO590-TCCCTTTTCTT <b>CXCT</b> CCCT <b>X</b>                                                                                                                                                                                                                                                       | 81.71                                | 78.91                  | 77.67                  | 76.16                  | 67.05               | 69.09               | 70.09               | 71.38               |
| LC D-237     | ATTO590-TCCCTTTT <b>XCTT</b> CCCTCCCT <b>X</b>                                                                                                                                                                                                                                                      | 82.21                                | 79.55                  | 78.36                  | 76.66                  | 67.16               | 69.20               | 70.17               | 71.81               |
| LC D-426     | ATTO590-TCCCTTTT <b>CXTX</b> TCCCTCCCT                                                                                                                                                                                                                                                              | 73.46                                | 70.65                  | 69.46                  | 68.02                  |                     |                     |                     |                     |
| LC D-428     | ATTO590-TCCCTTTT <b>XCTX</b> TCXCTCCCT                                                                                                                                                                                                                                                              | 80.57                                | 78.25                  | 77.32                  | 75.93                  |                     |                     |                     |                     |
| LC D-254     | ATTO590-TCCCTTTT <b>XCTT</b> CXCTC <b>XCT</b>                                                                                                                                                                                                                                                       | 83.23                                | 80.69                  | 79.79                  | 78.14                  |                     | 67.37               | 66.42               | 67.59               |
| LC D-435     | ATTO590-TCCCTTT <b>XCTT</b> CXCTCC <b>CTX</b>                                                                                                                                                                                                                                                       | 84.61                                | 82.32                  | 81.27                  | 79.76                  | 64.61               | 66.91               | 67.33               | 68.97               |
| LC D-584     | ATTO590- <b>X</b> TCCCTTTTCT <b>X</b> TCCCTCCCT <b>X</b>                                                                                                                                                                                                                                            | 83.64                                | 80.97                  | 79.88                  | 78.02                  | 68.06               | 69.63               | 70.55               | 71.70               |
| LC D-438     | ATTO590- <b>X</b> TCCCTT <b>XTTCTT</b> CXCTCC <b>CTX</b>                                                                                                                                                                                                                                            | 86.91                                | 84.46                  | 83.37                  | 82.04                  | 65.96               | 68.02               | 68.83               | 70.20               |

**Supplementary data - table 6. Influence of preincubation time before dissociation curve acquisition**

T<sub>m</sub> data for parallel triplexes from table 1 determined using 1.0 μM of each strand in sodium acetate buffer (50 mM NaOAc, 100 mM NaCl and 10 mM MgCl<sub>2</sub>) at pH 5.0. X symbolises TINA.

**Basic LightCycler2.0 dissociation program**

- 1) Heating to 90°C at a ramp rate of 0.2°C/second and hold for 15 seconds.
- 2) Cooling to 37°C at a ramp rate of 0.2°C/second and hold for Y minutes before
- 3) Heating to 90°C at a ramp rate of 0.05°C/second and continuous measurements or heating with a ramp rate of 0.05°C/second with hold for Z seconds before single measurements (one measurement per °C).

| LightCycler program type<br>ramp rate (°C/minute) | Dissociation |      |      |      |     |     |     |      |
|---------------------------------------------------|--------------|------|------|------|-----|-----|-----|------|
|                                                   | 3            | 3    | 3    | 3    | 0.2 | 0.2 | 0.2 | 0.2  |
| Y (minutes)                                       | 5            | 30   | 60   | 1440 | 5   | 30  | 60  | 1440 |
| Z (seconds)                                       | none         | none | none | none | 280 | 280 | 280 | 280  |

| TFO sequence | LightCycler2.0 program. Influence of preincubation time on determination of T <sub>m</sub> . All triplexes consist of D-200 (5' ATTO495-AGGGAAAAGAAGGGAGGGATAAC 3') as target sequence with D-256 (5' GTTATCCCTCCCTTCTTTCCCT 3') as antiparallel duplex strand (AD) and different triplex forming oligonucleotides (TFOs) | Hold for 5 minutes (ramp rate 3°C/minute) | Hold for 30 minutes (ramp rate 3°C/minute) |       | Hold for 24 hours (ramp rate 3°C/minute) | Hold for 5 minutes (ramp rate 0.2°C/minute) | Hold for 30 minutes (ramp rate 0.2°C/minute) |       | Hold for 24 hours (ramp rate 0.2°C/minute) |
|--------------|---------------------------------------------------------------------------------------------------------------------------------------------------------------------------------------------------------------------------------------------------------------------------------------------------------------------------|-------------------------------------------|--------------------------------------------|-------|------------------------------------------|---------------------------------------------|----------------------------------------------|-------|--------------------------------------------|
|              |                                                                                                                                                                                                                                                                                                                           |                                           |                                            |       |                                          |                                             |                                              |       |                                            |
| LC D-284     | ATTO590-TCCCTTTTCTTCCCTCCCT                                                                                                                                                                                                                                                                                               | 73.49                                     | 73.20                                      | 73.28 | 73.21                                    | 70.23                                       | 70.43                                        | 70.38 | 69.94                                      |
| LC D-293     | ATTO590-TCCCTTTT <del>X</del> CTTCCCTCCCT                                                                                                                                                                                                                                                                                 | 78.71                                     | 78.38                                      | 78.39 | 78.46                                    | 72.94                                       | 73.37                                        | 73.14 | 72.59                                      |
| LC D-294     | ATTO590-TCCCTTTT <del>C</del> XTTCCCTCCCT                                                                                                                                                                                                                                                                                 | 78.24                                     | 77.72                                      | 77.86 | 77.85                                    | 72.32                                       | 72.61                                        | 72.67 | 71.99                                      |
| LC D-295     | ATTO590-TCCCTTTTCT <del>X</del> TCCCTCCCT                                                                                                                                                                                                                                                                                 | 79.18                                     | 78.77                                      | 78.96 | 79.04                                    | 73.14                                       | 73.69                                        | 73.55 | 72.82                                      |
| LC D-297     | ATTO590-TCCCTTTTCTT <del>C</del> XCCTCCCT                                                                                                                                                                                                                                                                                 | 78.12                                     | 77.61                                      | 77.88 | 77.77                                    | 72.21                                       | 72.39                                        | 72.36 | 71.79                                      |
| LC D-299     | ATTO590-TCCCTTTTCTTCCC <del>X</del> TCCCT                                                                                                                                                                                                                                                                                 | 77.87                                     | 77.38                                      | 77.57 | 77.65                                    | 72.09                                       | 72.50                                        | 72.36 | 71.90                                      |
| LC D-300     | ATTO590-TCCCTTTTCTTCCCT <del>X</del> CCCT                                                                                                                                                                                                                                                                                 | 78.95                                     | 78.56                                      | 78.51 | 78.71                                    | 73.18                                       | 73.44                                        | 73.46 | 72.82                                      |
| LC D-301     | ATTO590-TCCCTTTTCTTCCCT <del>C</del> XCCT                                                                                                                                                                                                                                                                                 | 76.61                                     | 76.18                                      | 76.24 | 76.50                                    | 71.68                                       | 71.83                                        | 71.77 | 71.21                                      |
| LC D-304     | ATTO590-TCCCTTTTCTTCCCTCCCT <del>X</del>                                                                                                                                                                                                                                                                                  | 78.20                                     | 77.72                                      | 77.74 | 77.94                                    | 72.87                                       | 73.15                                        | 73.14 | 72.59                                      |
| LC D-305     | ATTO590-TCCCTTTT <del>C</del> <del>X</del> T <del>X</del> TCCCTCCCT                                                                                                                                                                                                                                                       | 75.46                                     | 75.17                                      | 75.35 | 75.43                                    | 69.65                                       | 70.22                                        | 70.17 | 69.37                                      |
| LC D-307     | ATTO590-TCCCTTTT <del>X</del> CTT <del>X</del> CCCTCCCT                                                                                                                                                                                                                                                                   | 80.32                                     | 79.81                                      | 79.99 | 80.01                                    | 74.09                                       | 75.10                                        | 74.88 | 73.40                                      |
| LC D-309A    | ATTO590-TCCCTTT <del>X</del> TCTT <del>C</del> XCCCTCCCT                                                                                                                                                                                                                                                                  | 81.05                                     | 80.59                                      | 80.82 | 80.75                                    | 75.23                                       | 76.08                                        | 75.84 | 74.55                                      |
| LC D-310     | ATTO590-TCCCTT <del>X</del> TTCTTCC <del>X</del> CTCCCT                                                                                                                                                                                                                                                                   | 80.34                                     | 79.85                                      | 80.10 | 79.90                                    | 74.07                                       | 75.00                                        | 74.58 | 73.40                                      |
| LC D-313     | ATTO590-TCCCT <del>X</del> TTTCTTCCCT <del>X</del> CCCT                                                                                                                                                                                                                                                                   | 81.80                                     | 81.37                                      | 81.56 | 81.66                                    | 75.68                                       | 76.41                                        | 76.35 | 74.98                                      |
| LC D-231     | ATTO590-TCC <del>X</del> CTTTTCTTCCCTCC <del>X</del> CT                                                                                                                                                                                                                                                                   | 79.31                                     | 78.60                                      | 79.01 | 78.95                                    | 73.13                                       | 73.69                                        | 73.54 | 73.00                                      |
| LC D-236     | ATTO590- <del>X</del> TCCCTTTTCTTCCCTCCCT <del>X</del>                                                                                                                                                                                                                                                                    | 80.96                                     | 80.64                                      | 80.81 | 80.90                                    | 75.00                                       | 75.44                                        | 75.27 | 74.52                                      |
| LC D-341     | ATTO590-TCCCTTTTCTTCCCTCCC <del>X</del> T <del>X</del>                                                                                                                                                                                                                                                                    | 76.97                                     | 76.52                                      | 76.80 | 76.92                                    | 71.68                                       | 72.04                                        | 71.96 | 71.29                                      |
| LC D-343     | ATTO590-TCCCTTTTCTTCCCT <del>C</del> XCCCT <del>X</del>                                                                                                                                                                                                                                                                   | 80.16                                     | 79.86                                      | 80.08 | 80.09                                    | 73.77                                       | 74.55                                        | 74.24 | 73.64                                      |
| LC D-344     | ATTO590-TCCCTTTTCTTCCCT <del>X</del> CCCT <del>X</del>                                                                                                                                                                                                                                                                    | 81.83                                     | 81.49                                      | 81.65 | 81.72                                    | 75.55                                       | 76.31                                        | 76.05 | 75.21                                      |
| LC D-346     | ATTO590-TCCCTTTTCTTCC <del>X</del> CTCCCT <del>X</del>                                                                                                                                                                                                                                                                    | 82.34                                     | 82.20                                      | 82.12 | 82.22                                    | 76.01                                       | 76.86                                        | 76.28 | 75.64                                      |
| LC D-347     | ATTO590-TCCCTTTTCTT <del>C</del> XCCCTCCCT <del>X</del>                                                                                                                                                                                                                                                                   | 81.71                                     | 81.47                                      | 81.58 | 81.62                                    | 75.27                                       | 76.16                                        | 75.70 | 74.78                                      |
| LC D-237     | ATTO590-TCCCTTTT <del>X</del> CTTCCCTCCCT <del>X</del>                                                                                                                                                                                                                                                                    | 82.21                                     | 81.87                                      | 82.00 | 81.99                                    | 76.04                                       | 76.66                                        | 76.51 | 75.70                                      |
| LC D-426     | ATTO590-TCCCTTTT <del>C</del> <del>X</del> T <del>X</del> TCCCTCCCT                                                                                                                                                                                                                                                       | 73.46                                     | 72.99                                      | 73.17 | 73.06                                    | 67.23                                       | 68.02                                        | 67.91 | 66.49                                      |
| LC D-428     | ATTO590-TCCCTTTT <del>X</del> CT <del>X</del> T <del>C</del> XCCCTCCCT                                                                                                                                                                                                                                                    | 80.57                                     | 80.24                                      | 80.27 | 80.19                                    | 75.47                                       | 75.93                                        | 75.81 | 75.01                                      |
| LC D-254     | ATTO590-TCCCTTTT <del>X</del> CTT <del>C</del> XCCCT <del>C</del> XCCCT                                                                                                                                                                                                                                                   | 83.23                                     | 82.76                                      | 82.86 | 82.80                                    | 77.67                                       | 78.14                                        | 78.21 | 77.32                                      |
| LC D-435     | ATTO590-TCCCTTTT <del>X</del> TCTT <del>C</del> XCCCTCCC <del>X</del> T                                                                                                                                                                                                                                                   | 84.61                                     | 84.41                                      | 84.53 | 84.54                                    | 79.62                                       | 79.76                                        | 79.92 | 78.93                                      |
| LC D-584     | ATTO590- <del>X</del> TCCCTTTTCT <del>X</del> TCCCTCCCT <del>X</del>                                                                                                                                                                                                                                                      | 83.64                                     | 83.42                                      | 83.54 | 83.38                                    | 77.10                                       | 78.02                                        | 77.69 | 76.71                                      |
| LC D-438     | ATTO590- <del>X</del> TCCCTT <del>X</del> TTCTT <del>C</del> XCCCTCCC <del>X</del> T                                                                                                                                                                                                                                      | 86.91                                     | 86.49                                      | 86.51 | 86.67                                    | 81.78                                       | 82.04                                        | 82.19 | 81.12                                      |

**Supplementary data - table 7. Influence of pH on Tm determinations**

Tm data for parallel triplexes from table 1 determined using 1.0 µM of each strand in sodium acetate buffer (50 mM NaOAc, 100 mM NaCl and 10 mM MgCl<sub>2</sub>) at pH 5.0, 5.5 or 6.0. X symbolises TINA. Shattered boxes symbolises that Tm could not be determined. Melting curves for Tms marked in bold are shown as examples of melting curves at the end of supplementary data.

**Basic LightCycler2.0 dissociation program**

- 1) Heating to 90°C at a ramp rate of 0.2°C/second and hold for 15 seconds.
- 2) Cooling to 37°C at a ramp rate of 0.2°C/second and hold for Y minutes before
- 3) Heating to 90°C at a ramp rate of 0.05°C/second and continuous measurements or heating with a ramp rate of 0.05°C/second with hold for Z seconds before single measurements (one measurement per °C).

**Basic LightCycler2.0 annealing program**

- 1) Heating to 90°C at a ramp rate of 0.2°C/second and hold for Y minutes.
- 2) Cooling to 37°C at a ramp rate of 0.05°C/second and continuous measurements or cooling with a ramp rate of 0.05°C/second with hold for Z seconds before single measurements (one measurement per °C).

| LightCycler program type | Dissociation |      |      |     |     |     | Annealing |      |      |     |     |     |
|--------------------------|--------------|------|------|-----|-----|-----|-----------|------|------|-----|-----|-----|
| ramp rate (°C/minute)    | 3            | 3    | 3    | 0.2 | 0.2 | 0.2 | 3         | 3    | 3    | 0.2 | 0.2 | 0.2 |
| Y (minutes)              | 5            | 5    | 5    | 30  | 30  | 30  | 5         | 5    | 5    | 10  | 10  | 10  |
| Z (seconds)              | none         | none | none | 280 | 280 | 280 | none      | none | none | 280 | 280 | 280 |
| pH                       | 5.0          | 5.5  | 6.0  | 5.0 | 5.5 | 6.0 | 5.0       | 5.5  | 6.0  | 5.0 | 5.5 | 6.0 |

| TFO sequence | LightCycler2.0 program. Influence of pH on determination of Tm. All triplexes consist of D-200 (5' ATTO495-AGGGAAAAGAGGGAGGGATAAC 3') as target sequence with D-256 (5' GTTATCCCTCCCTTCTTTCCCT 3') as antiparallel duplex strand (AD) and different triplex forming oligonucleotides (TFOs) | Dissociation                               |                                            |                                            | Dissociation                                 |                                              |                                              | Annealing                               |                                         |                                         | Annealing                                 |                                           |                                           |
|--------------|---------------------------------------------------------------------------------------------------------------------------------------------------------------------------------------------------------------------------------------------------------------------------------------------|--------------------------------------------|--------------------------------------------|--------------------------------------------|----------------------------------------------|----------------------------------------------|----------------------------------------------|-----------------------------------------|-----------------------------------------|-----------------------------------------|-------------------------------------------|-------------------------------------------|-------------------------------------------|
|              |                                                                                                                                                                                                                                                                                             | pH 5.0 (dissociation ramp rate 3°C/minute) | pH 5.5 (dissociation ramp rate 3°C/minute) | pH 6.0 (dissociation ramp rate 3°C/minute) | pH 5.0 (dissociation ramp rate 0.2°C/minute) | pH 5.5 (dissociation ramp rate 0.2°C/minute) | pH 6.0 (dissociation ramp rate 0.2°C/minute) | pH 5.0 (annealing ramp rate 3°C/minute) | pH 5.5 (annealing ramp rate 3°C/minute) | pH 6.0 (annealing ramp rate 3°C/minute) | pH 5.0 (annealing ramp rate 0.2°C/minute) | pH 5.5 (annealing ramp rate 0.2°C/minute) | pH 6.0 (annealing ramp rate 0.2°C/minute) |
| LC D-284     | ATTO590-TCCCTTTTCTTCCCTCCCT                                                                                                                                                                                                                                                                 | 73.49                                      | <b>60.29</b>                               | 43.69                                      | 70.43                                        | <b>57.28</b>                                 | 38.08                                        | 68.31                                   | <b>55.39</b>                            |                                         | 69.80                                     | <b>56.98</b>                              | 37.43                                     |
| LC D-293     | ATTO590-TCCCTTTT <b>X</b> CTTCCCTCCCT                                                                                                                                                                                                                                                       | 78.71                                      | 67.40                                      | 53.08                                      | 73.37                                        | 62.48                                        | 47.34                                        | 66.74                                   | 53.51                                   |                                         | 70.69                                     | 60.71                                     | 40.68                                     |
| LC D-294     | ATTO590-TCCCTTTT <b>CX</b> TTCCCTCCCT                                                                                                                                                                                                                                                       | 78.24                                      | 66.55                                      | 51.57                                      | 72.61                                        | 61.21                                        | 45.94                                        | 66.36                                   | 52.32                                   |                                         | 70.23                                     | 59.39                                     | 40.74                                     |
| LC D-295     | ATTO590-TCCCTTTTCT <b>X</b> TCCCTCCCT                                                                                                                                                                                                                                                       | 79.18                                      | 67.70                                      | 52.84                                      | 73.69                                        | 62.51                                        | 47.16                                        | 66.76                                   | 54.08                                   |                                         | 70.89                                     | 61.16                                     | 42.80                                     |
| LC D-297     | ATTO590-TCCCTTTTCTT <b>CX</b> CTCCCT                                                                                                                                                                                                                                                        | 78.12                                      | 65.71                                      | 50.72                                      | 72.39                                        | 61.02                                        | 44.94                                        | 66.78                                   | 57.17                                   |                                         | 70.66                                     | 60.44                                     | 41.47                                     |
| LC D-299     | ATTO590-TCCCTTTTCTTCC <b>CX</b> TCCCT                                                                                                                                                                                                                                                       | 77.87                                      | 65.69                                      | 50.07                                      | 72.50                                        | 60.83                                        | 44.54                                        | 67.38                                   | 58.76                                   |                                         | 71.12                                     | 60.62                                     | 42.40                                     |
| LC D-300     | ATTO590-TCCCTTTTCTTCCCT <b>X</b> CCCT                                                                                                                                                                                                                                                       | 78.95                                      | 67.33                                      | 51.85                                      | 73.44                                        | 62.89                                        | 46.34                                        | 67.85                                   | 60.43                                   |                                         | 71.84                                     | 62.79                                     | 44.52                                     |
| LC D-301     | ATTO590-TCCCTTTTCTTCCCT <b>CX</b> CT                                                                                                                                                                                                                                                        | 76.61                                      | 64.51                                      | 48.83                                      | 71.83                                        | 60.44                                        | 43.21                                        | 67.73                                   | 59.08                                   |                                         | 70.78                                     | 60.26                                     | 41.87                                     |
| LC D-304     | ATTO590-TCCCTTTTCTTCCCT <b>CX</b> CT                                                                                                                                                                                                                                                        | 78.20                                      | 65.76                                      | 49.61                                      | 73.15                                        | 62.38                                        | 44.81                                        | 69.11                                   | 61.93                                   |                                         | 72.38                                     | 62.37                                     | 43.99                                     |
| LC D-305     | ATTO590-TCCCTTTT <b>CX</b> TCCCTCCCT                                                                                                                                                                                                                                                        | 75.46                                      | 64.41                                      | 49.19                                      | 70.22                                        | 58.40                                        | 43.46                                        | 60.82                                   | 50.60                                   |                                         | 68.02                                     | 54.05                                     |                                           |
| LC D-307     | ATTO590-TCCCTTTT <b>X</b> CTTCCCTCCCT                                                                                                                                                                                                                                                       | 80.32                                      | 70.01                                      | 57.46                                      | 75.10                                        | 65.09                                        | 51.53                                        | 62.08                                   | 52.51                                   |                                         | 69.20                                     | 61.38                                     | 45.78                                     |
| LC D-309A    | ATTO590-TCCCTTTT <b>X</b> TCTTCCCTCCCT                                                                                                                                                                                                                                                      | 81.05                                      | 70.88                                      | 57.86                                      | 76.08                                        | 66.06                                        | 51.80                                        | 63.16                                   | 61.61                                   |                                         | 69.78                                     | 63.55                                     | 46.24                                     |
| LC D-310     | ATTO590-TCCCTTTTCTTCC <b>X</b> CTCCCT                                                                                                                                                                                                                                                       | 80.34                                      | 69.91                                      | 56.07                                      | 75.00                                        | 64.71                                        | 50.52                                        | 62.23                                   | 62.47                                   |                                         | 69.32                                     | 62.46                                     | 45.12                                     |
| LC D-313     | ATTO590-TCCCT <b>X</b> TTTCTTCCCT <b>X</b> CCCT                                                                                                                                                                                                                                             | 81.80                                      | 71.85                                      | 58.75                                      | 76.41                                        | 67.37                                        | 53.48                                        | 64.48                                   | 64.67                                   |                                         | 70.46                                     | 66.45                                     | 50.75                                     |
| LC D-231     | ATTO590-TCC <b>X</b> TTTTCTTCCCTCC <b>X</b> CT                                                                                                                                                                                                                                              | 79.31                                      | 68.35                                      | 53.64                                      | 73.69                                        | 63.93                                        | 48.68                                        | 67.63                                   | 64.03                                   |                                         | 71.50                                     | 63.79                                     | 46.25                                     |
| LC D-236     | ATTO590- <b>X</b> TCCCTTTTCTTCCCTCCCT <b>X</b>                                                                                                                                                                                                                                              | 80.96                                      | <b>70.10</b>                               | 52.11                                      | 75.44                                        | <b>68.39</b>                                 | 49.94                                        | 69.93                                   | <b>68.21</b>                            |                                         | 73.22                                     | <b>68.23</b>                              | 50.15                                     |
| LC D-341     | ATTO590-TCCCTTTTCTTCCCTCC <b>CX</b> T <b>X</b>                                                                                                                                                                                                                                              | 76.97                                      | 64.56                                      | 47.94                                      | 72.04                                        | 60.83                                        | 42.84                                        | 68.56                                   | 60.08                                   |                                         | 71.24                                     | 60.38                                     | 42.13                                     |
| LC D-343     | ATTO590-TCCCTTTTCTTCCCTC <b>X</b> CT <b>X</b>                                                                                                                                                                                                                                               | 80.16                                      | 68.62                                      | 52.91                                      | 74.55                                        | 64.22                                        | 47.01                                        | 68.21                                   | 62.28                                   |                                         | 72.19                                     | 63.91                                     | 45.58                                     |
| LC D-344     | ATTO590-TCCCTTTTCTTCCCT <b>X</b> CCCT <b>X</b>                                                                                                                                                                                                                                              | 81.83                                      | 71.11                                      | 56.18                                      | 76.31                                        | 66.35                                        | 50.32                                        | 67.51                                   | 62.37                                   |                                         | 72.19                                     | 65.54                                     | 47.43                                     |
| LC D-346     | ATTO590-TCCCTTTTCTTCC <b>X</b> CTCCCT <b>X</b>                                                                                                                                                                                                                                              | 82.34                                      | 71.95                                      | 56.69                                      | 76.86                                        | 67.03                                        | 50.72                                        | 67.60                                   | 59.69                                   |                                         | 72.19                                     | 65.18                                     | 46.98                                     |
| LC D-347     | ATTO590-TCCCTTTTCTT <b>CX</b> CTCCCT <b>X</b>                                                                                                                                                                                                                                               | 81.71                                      | 70.93                                      | 55.72                                      | 76.16                                        | 65.87                                        | 49.61                                        | 67.05                                   | 58.64                                   |                                         | 71.38                                     | 64.64                                     | 46.44                                     |
| LC D-237     | ATTO590-TCCCTTTT <b>X</b> CTTCCCTCCCT <b>X</b>                                                                                                                                                                                                                                              | 82.21                                      | 72.02                                      | 58.31                                      | 76.66                                        | 67.61                                        | 52.33                                        | 67.16                                   | 62.47                                   |                                         | 71.81                                     | 66.26                                     | 47.04                                     |
| LC D-426     | ATTO590-TCCCTTTT <b>CX</b> T <b>X</b> TCCCTCCCT                                                                                                                                                                                                                                             | 73.46                                      | 63.47                                      |                                            | 68.02                                        | 57.01                                        | 43.58                                        |                                         |                                         |                                         |                                           |                                           |                                           |
| LC D-428     | ATTO590-TCCCTTTT <b>X</b> CT <b>X</b> TCCCTCCCT                                                                                                                                                                                                                                             | 80.57                                      | 72.73                                      |                                            | 75.93                                        | 67.23                                        | 54.89                                        |                                         |                                         |                                         |                                           | 59.17                                     |                                           |
| LC D-254     | ATTO590-TCCCTTTT <b>X</b> CTTCCCTC <b>X</b> CT                                                                                                                                                                                                                                              | 83.23                                      | 75.67                                      |                                            | 78.14                                        | 70.14                                        | 57.37                                        |                                         |                                         |                                         | 67.59                                     | 61.38                                     | 49.22                                     |
| LC D-435     | ATTO590-TCCCTTTT <b>X</b> TCTTCCCTCC <b>CX</b> T                                                                                                                                                                                                                                            | 84.61                                      | 76.25                                      | 62.70                                      | 79.76                                        | 71.00                                        | 57.41                                        | 64.61                                   | 57.87                                   |                                         | 68.97                                     | 66.45                                     | 50.23                                     |
| LC D-584     | ATTO590- <b>X</b> TCCCTTTTCT <b>X</b> TCCCTCCCT <b>X</b>                                                                                                                                                                                                                                    | 83.64                                      | 72.95                                      | 56.95                                      | 78.02                                        | 68.29                                        | 51.01                                        | 68.06                                   | 64.19                                   |                                         | 71.70                                     | 67.89                                     | 49.99                                     |
| LC D-438     | ATTO590- <b>X</b> TCCCTTTTCTTCCCTCC <b>CX</b> T                                                                                                                                                                                                                                             | 86.91                                      | 79.04                                      | 65.30                                      | 82.04                                        | 73.43                                        | 59.59                                        | 65.96                                   | 63.24                                   |                                         | 70.20                                     | 68.44                                     | 52.74                                     |

**Supplementary data - table 8. Influence of buffer and pH on ΔTm of antiparallel duplexes and parallel triplexes**

**Parallel triplexes** consisting of LC D-256 (5' GTTATCCCTCCCTTCTTTCCCT 3') as antiparallel duplex strand, LC D-284 (5' ATTO590-TCCCTTTTCTCCCTCCCT 3') as triplex forming oligonucleotide (TFO) and different target strands (LC D-200 to LC D-224) using 1.0 μM of each oligonucleotide in sodium acetate buffer (50 mM NaOAc, 100 mM NaCl and 10 mM MgCl<sub>2</sub>) at pH 5.0, 5.5 or 6.0.

**Antiparallel duplexes** consisting of LC D-484 (5' GTTATCCCTCCCTTCTTTCCCT-ATTO590 3') as antiparallel duplex strand and different target strands (LC D-200 to LC D-224) using 0.5 μM of each oligonucleotide in either sodium acetate buffer (50 mM NaOAc, 100 mM NaCl and 10 mM MgCl<sub>2</sub>) at pH 5.0, 5.5 or 6.0 or phosphate buffer (50 mM NaH<sub>2</sub>PO<sub>4</sub>/Na<sub>2</sub>HPO<sub>4</sub>, 100 mM NaCl and 0.1 mM EDTA) at pH 5.5, 6.0 and 7.0.

base mismatches are marked in bold. The lower temperature limit of the LightCycler2.0 is 37°C.

**Basic LightCycler2.0 dissociation program**

- 1) Heating to 90°C at a ramp rate of 0.2°C/second and hold for 15 seconds.
- 2) Cooling to 37°C at a ramp rate of 0.2°C/second and hold for Y minutes (Y either 5 minutes or 30 minutes) before
- 3) Heating to 90°C at a ramp rate of 0.05°C/second and continuous measurements or heating with a ramp rate of 0.05°C/second with hold for 280 seconds (Z) before single measurements (one measurement per °C).

**Basic LightCycler2.0 annealing program**

- 1) Heating to 90°C at a ramp rate of 0.2°C/second and hold for Y minutes (Y either 5 minutes or 10 minutes).
- 2) Cooling to 37°C at a ramp rate of 0.05°C/second and continuous measurements or cooling with a ramp rate of 0.05°C/second with hold for 280 seconds (Z) before single measurements (one measurement per °C).

| Parallel triplex (PT) or antiparallel duplex (AD)                  |                                                   | PT      |       | AD      |       | PT      |        | AD      |       | AD        |  | PT      |  | AD      |  | AD        |  | AD        |  |  |
|--------------------------------------------------------------------|---------------------------------------------------|---------|-------|---------|-------|---------|--------|---------|-------|-----------|--|---------|--|---------|--|-----------|--|-----------|--|--|
| pH                                                                 |                                                   | 5.0     |       | 5.0     |       | 5.5     |        | 5.5     |       | 5.5       |  | 6.0     |  | 6.0     |  | 6.0       |  | 7.0       |  |  |
| Buffer type                                                        |                                                   | Acetate |       | Acetate |       | Acetate |        | Acetate |       | Phosphate |  | Acetate |  | Acetate |  | Phosphate |  | Phosphate |  |  |
| <b>Dissociation 3°C/minute (Y = 5 minutes, Z = none)</b>           |                                                   |         |       |         |       |         |        |         |       |           |  |         |  |         |  |           |  |           |  |  |
| LC D-200                                                           | ATTO495-AGGGAAAAGAAGGGAGGGATAAC                   | 73.09   | 70.24 | 59.60   | 71.96 | 68.51   | 43.00  | 72.48   | 69.42 | 70.17     |  |         |  |         |  |           |  |           |  |  |
| LC D-201                                                           | ATTO495-AGGGAAAAGAAGGGAGGGATAAC                   | 65.28   | 64.20 | 51.87   | 65.81 | 61.94   | <37.00 | 66.25   | 62.39 | 63.26     |  |         |  |         |  |           |  |           |  |  |
| LC D-202                                                           | ATTO495-AGGG <b>AAA</b> AGAAGGGAGGGATAAC          | 64.68   | 65.89 | 51.30   | 66.83 | 63.33   | <37.00 | 67.03   | 63.39 | 63.67     |  |         |  |         |  |           |  |           |  |  |
| LC D-203                                                           | ATTO495-AGGG <b>T</b> AAAAGAAGGGAGGGATAAC         | 65.39   | 63.54 | 52.11   | 65.74 | 61.06   | <37.00 | 66.40   | 62.13 | 63.39     |  |         |  |         |  |           |  |           |  |  |
| LC D-204                                                           | ATTO495-AGGGAA <b>C</b> AGAAGGGAGGGATAAC          | 61.08   | 61.70 | 46.00   | 64.02 | 60.16   | <37.00 | 64.90   | 61.25 | 62.38     |  |         |  |         |  |           |  |           |  |  |
| LC D-205                                                           | ATTO495-AGGGAA <b>G</b> AGAAGGGAGGGATAAC          | 62.89   | 68.32 | 48.34   | 69.45 | 62.67   | <37.00 | 69.67   | 63.51 | 64.64     |  |         |  |         |  |           |  |           |  |  |
| LC D-206                                                           | ATTO495-AGGGAA <b>T</b> AGAAGGGAGGGATAAC          | 60.72   | 64.05 | 44.95   | 66.21 | 62.07   | <37.00 | 66.50   | 62.98 | 64.02     |  |         |  |         |  |           |  |           |  |  |
| LC D-222                                                           | ATTO495-AGGGAAA <b>A</b> AAGGGAGGGATAAC           | 58.40   | 65.26 | 44.00   | 65.95 | 62.09   | <37.00 | 65.44   | 61.65 | 61.24     |  |         |  |         |  |           |  |           |  |  |
| LC D-213                                                           | ATTO495-AGGGAAA <b>A</b> CAGGGAGGGATAAC           | 60.66   | 63.18 | 44.36   | 64.90 | 61.18   | <37.00 | 65.77   | 61.90 | 63.73     |  |         |  |         |  |           |  |           |  |  |
| LC D-214                                                           | ATTO495-AGGGAAA <b>A</b> GAGGGAGGGATAAC           | 61.01   | 65.95 | 45.04   | 67.93 | 63.91   | <37.00 | 68.65   | 64.75 | 66.15     |  |         |  |         |  |           |  |           |  |  |
| LC D-215                                                           | ATTO495-AGGGAAA <b>A</b> G <b>T</b> AGGGAGGGATAAC | 60.99   | 63.74 | 45.26   | 65.73 | 61.56   | <37.00 | 66.42   | 62.86 | 64.58     |  |         |  |         |  |           |  |           |  |  |
| LC D-218                                                           | ATTO495-AGGGAAA <b>A</b> GAGGGAGGGATAAC           | 62.80   | 65.32 | 47.59   | 67.37 | 63.60   | <37.00 | 68.09   | 64.66 | 65.38     |  |         |  |         |  |           |  |           |  |  |
| LC D-207                                                           | ATTO495-AGGGAAA <b>A</b> GA <b>C</b> GAGGGATAAC   | 61.86   | 63.84 | 47.63   | 64.67 | 61.46   | <37.00 | 64.86   | 61.18 | 60.66     |  |         |  |         |  |           |  |           |  |  |
| LC D-208                                                           | ATTO495-AGGGAAA <b>A</b> GA <b>A</b> GAGGGATAAC   | 60.09   | 65.00 | 46.02   | 65.57 | 62.41   | <37.00 | 65.26   | 62.42 | 61.73     |  |         |  |         |  |           |  |           |  |  |
| LC D-209                                                           | ATTO495-AGGGAAA <b>A</b> GA <b>T</b> GAGGGATAAC   | 61.65   | 62.11 | 47.51   | 64.17 | 59.96   | <37.00 | 64.66   | 60.65 | 61.79     |  |         |  |         |  |           |  |           |  |  |
| LC D-210                                                           | ATTO495-AGGGAAA <b>A</b> GA <b>G</b> CGGATAAC     | 66.17   | 63.30 | 54.34   | 64.63 | 60.63   | <37.00 | 64.86   | 60.43 | 60.09     |  |         |  |         |  |           |  |           |  |  |
| LC D-211                                                           | ATTO495-AGGGAAA <b>A</b> GA <b>A</b> GGGAAGGATAAC | 65.32   | 64.42 | 53.06   | 65.15 | 61.58   | <37.00 | 65.06   | 61.27 | 61.27     |  |         |  |         |  |           |  |           |  |  |
| LC D-212                                                           | ATTO495-AGGGAAA <b>A</b> GA <b>T</b> GGATAAC      | 65.14   | 62.45 | 53.12   | 64.10 | 59.56   | <37.00 | 64.92   | 60.33 | 61.37     |  |         |  |         |  |           |  |           |  |  |
| LC D-224                                                           | ATTO495-AGGGAAA <b>A</b> AGGGAGGGATAAC            | 52.90   | 60.90 | 39.97   | 62.25 | 57.73   | <37.00 | 62.65   | 57.78 | 58.73     |  |         |  |         |  |           |  |           |  |  |
| <b>Annealing 3°C/minute (Y = 5 minutes, Z = none)</b>              |                                                   |         |       |         |       |         |        |         |       |           |  |         |  |         |  |           |  |           |  |  |
| LC D-200                                                           | ATTO495-AGGGAAAAGAAGGGAGGGATAAC                   | 68.49   | 69.75 | 55.28   | 71.25 | 68.01   | <37.00 | 71.88   | 69.13 | 70.01     |  |         |  |         |  |           |  |           |  |  |
| LC D-201                                                           | ATTO495-AGGGAAAAGAAGGGAGGGATAAC                   | 61.40   | 63.58 | 47.51   | 65.23 | 61.36   | <37.00 | 65.61   | 61.99 | 62.89     |  |         |  |         |  |           |  |           |  |  |
| LC D-202                                                           | ATTO495-AGGG <b>AAA</b> AGAAGGGAGGGATAAC          | 61.64   | 65.17 | 47.45   | 66.60 | 62.67   | <37.00 | 66.57   | 62.80 | 63.21     |  |         |  |         |  |           |  |           |  |  |
| LC D-203                                                           | ATTO495-AGGG <b>T</b> AAAAGAAGGGAGGGATAAC         | 61.22   | 63.02 | 47.88   | 65.17 | 60.91   | <37.00 | 66.06   | 61.74 | 63.11     |  |         |  |         |  |           |  |           |  |  |
| LC D-204                                                           | ATTO495-AGGGAA <b>C</b> AGAAGGGAGGGATAAC          | 57.44   | 61.24 | 43.27   | 63.73 | 59.87   | <37.00 | 64.83   | 60.58 | 62.33     |  |         |  |         |  |           |  |           |  |  |
| LC D-205                                                           | ATTO495-AGGGAA <b>G</b> AGAAGGGAGGGATAAC          | 59.06   | 66.67 | 44.83   | 68.16 | 62.67   | <37.00 | 68.76   | 63.39 | 64.39     |  |         |  |         |  |           |  |           |  |  |
| LC D-206                                                           | ATTO495-AGGGAA <b>T</b> AGAAGGGAGGGATAAC          | 59.15   | 63.64 | 42.68   | 65.51 | 61.64   | <37.00 | 66.14   | 62.77 | 63.64     |  |         |  |         |  |           |  |           |  |  |
| LC D-222                                                           | ATTO495-AGGGAAA <b>A</b> AAGGGAGGGATAAC           | 57.06   | 64.66 | 43.25   | 65.46 | 61.47   | <37.00 | 64.89   | 61.24 | 61.13     |  |         |  |         |  |           |  |           |  |  |
| LC D-213                                                           | ATTO495-AGGGAAA <b>A</b> CAGGGAGGGATAAC           | 59.33   | 62.65 | 42.67   | 64.43 | 60.93   | <37.00 | 65.34   | 61.70 | 63.18     |  |         |  |         |  |           |  |           |  |  |
| LC D-214                                                           | ATTO495-AGGGAAA <b>A</b> GAGGGAGGGATAAC           | 59.65   | 65.34 | 43.41   | 67.36 | 63.60   | <37.00 | 68.13   | 64.26 | 65.77     |  |         |  |         |  |           |  |           |  |  |
| LC D-215                                                           | ATTO495-AGGGAAA <b>A</b> G <b>T</b> AGGGAGGGATAAC | 59.73   | 63.15 | 43.33   | 65.20 | 61.33   | <37.00 | 66.00   | 62.35 | 64.06     |  |         |  |         |  |           |  |           |  |  |
| LC D-218                                                           | ATTO495-AGGGAAA <b>A</b> GAGGGAGGGATAAC           | 61.25   | 64.92 | 45.57   | 66.79 | 63.07   | <37.00 | 67.51   | 64.32 | 65.12     |  |         |  |         |  |           |  |           |  |  |
| LC D-207                                                           | ATTO495-AGGGAAA <b>A</b> GA <b>C</b> GAGGGATAAC   | 60.31   | 63.31 | 45.75   | 64.19 | 60.90   | <37.00 | 64.62   | 60.70 | 60.24     |  |         |  |         |  |           |  |           |  |  |
| LC D-208                                                           | ATTO495-AGGGAAA <b>A</b> GA <b>A</b> GAGGGATAAC   | 58.99   | 64.59 | 44.01   | 65.28 | 61.84   | <37.00 | 65.08   | 61.88 | 61.53     |  |         |  |         |  |           |  |           |  |  |
| LC D-209                                                           | ATTO495-AGGGAAA <b>A</b> GA <b>T</b> GAGGGATAAC   | 59.99   | 61.59 | 46.17   | 63.52 | 59.53   | <37.00 | 64.32   | 60.30 | 61.21     |  |         |  |         |  |           |  |           |  |  |
| LC D-210                                                           | ATTO495-AGGGAAA <b>A</b> GA <b>G</b> CGGATAAC     | 62.28   | 62.63 | 51.95   | 63.90 | 60.02   | <37.00 | 64.17   | 59.85 | 59.65     |  |         |  |         |  |           |  |           |  |  |
| LC D-211                                                           | ATTO495-AGGGAAA <b>A</b> GA <b>A</b> GGGAAGGATAAC | 62.84   | 63.78 | 50.88   | 64.69 | 61.05   | <37.00 | 64.81   | 60.90 | 60.79     |  |         |  |         |  |           |  |           |  |  |
| LC D-212                                                           | ATTO495-AGGGAAA <b>A</b> GA <b>T</b> GGATAAC      | 61.67   | 61.81 | 50.88   | 63.60 | 59.16   | <37.00 | 64.29   | 59.73 | 60.87     |  |         |  |         |  |           |  |           |  |  |
| LC D-224                                                           | ATTO495-AGGGAAA <b>A</b> AGGGAGGGATAAC            | 51.93   | 60.48 | <37.00  | 61.84 | 57.29   | <37.00 | 62.04   | 57.37 | 58.48     |  |         |  |         |  |           |  |           |  |  |
| <b>Dissociation 0,2°C/minute (Y = 30 minutes, Z = 280 seconds)</b> |                                                   |         |       |         |       |         |        |         |       |           |  |         |  |         |  |           |  |           |  |  |
| LC D-200                                                           | ATTO495-AGGGAAAAGAAGGGAGGGATAAC                   | 70.35   | 69.97 | 56.58   | 71.65 | 68.38   | 38.67  | 72.12   | 69.56 | 70.34     |  |         |  |         |  |           |  |           |  |  |
| LC D-201                                                           | ATTO495-AGGGAAAAGAAGGGAGGGATAAC                   | 62.77   | 63.89 | 48.09   | 65.48 | 61.65   | <37.00 | 66.01   | 62.25 | 63.24     |  |         |  |         |  |           |  |           |  |  |
| LC D-202                                                           | ATTO495-AGGG <b>AAA</b> AGAAGGGAGGGATAAC          | 62.96   | 65.48 | 47.81   | 66.69 | 63.05   | <37.00 | 66.98   | 63.14 | 63.64     |  |         |  |         |  |           |  |           |  |  |
| LC D-203                                                           | ATTO495-AGGG <b>T</b> AAAAGAAGGGAGGGATAAC         | 62.77   | 63.14 | 48.00   | 65.29 | 60.90   | <37.00 | 66.10   | 62.22 | 63.09     |  |         |  |         |  |           |  |           |  |  |
| LC D-204                                                           | ATTO495-AGGGAA <b>C</b> AGAAGGGAGGGATAAC          | 58.78   | 61.32 | 44.01   | 63.44 | 59.86   | <37.00 | 64.49   | 61.17 | 62.48     |  |         |  |         |  |           |  |           |  |  |
| LC D-205                                                           | ATTO495-AGGGAA <b>G</b> AGAAGGGAGGGATAAC          | 60.21   | 67.20 | 46.66   | 68.60 | 62.57   | <37.00 | 69.95   | 63.53 | 64.41     |  |         |  |         |  |           |  |           |  |  |
| LC D-206                                                           | ATTO495-AGGGAA <b>T</b> AGAAGGGAGGGATAAC          | 59.60   | 63.36 | 43.69   | 65.28 | 61.96   | <37.00 | 66.46   | 62.66 | 63.85     |  |         |  |         |  |           |  |           |  |  |
| LC D-222                                                           | ATTO495-AGGGAAA <b>A</b> AAGGGAGGGATAAC           | 57.26   | 64.41 | 43.36   | 65.54 | 61.81   | <37.00 | 64.93   | 61.55 | 61.20     |  |         |  |         |  |           |  |           |  |  |
| LC D-213                                                           | ATTO495-AGGGAAA <b>A</b> CAGGGAGGGATAAC           | 59.68   | 62.86 | 43.01   | 64.51 | 60.87   | <37.00 | 65.45   | 61.65 | 63.33     |  |         |  |         |  |           |  |           |  |  |
| LC D-214                                                           | ATTO495-AGGGAAA <b>A</b> GAGGGAGGGATAAC           | 59.96   | 65.35 | 43.76   | 67.26 | 63.95   | <37.00 | 68.35   | 64.54 | 65.95     |  |         |  |         |  |           |  |           |  |  |
| LC D-215                                                           | ATTO495-AGGGAAA <b>A</b> G <b>T</b> AGGGAGGGATAAC | 59.87   | 63.23 | 44.07   | 65.35 | 61.27   | <37.00 | 66.22   | 62.58 | 64.36     |  |         |  |         |  |           |  |           |  |  |
| LC D-218                                                           | ATTO495-AGGGAAA <b>A</b> GAGGGAGGGATAAC           | 61.34   | 64.90 | 46.07   | 67.02 | 63.37   | <37.00 | 67.82   | 64.67 | 65.42     |  |         |  |         |  |           |  |           |  |  |
| LC D-207                                                           | ATTO495-AGGGAAA <b>A</b> GA <b>C</b> GAGGGATAAC   | 60.15   | 63.52 | 46.02   | 64.64 | 61.37   | <37.00 | 64.92   | 61.27 | 60.99     |  |         |  |         |  |           |  |           |  |  |
| LC D-208                                                           | ATTO495-AGGGAAA <b>A</b> GA <b>A</b> GAGGGATAAC   | 58.66   | 64.73 | 44.82   | 65.85 | 62.68   | <37.00 | 65.39   | 62.68 | 62.30     |  |         |  |         |  |           |  |           |  |  |
| LC D-209                                                           | ATTO495-AGGGAAA <b>A</b> GA <b>T</b> GAGGGATAAC   | 60.43   | 62.11 | 46.40   | 63.89 | 59.96   | <37.00 | 64.45   | 60.87 | 61.93     |  |         |  |         |  |           |  |           |  |  |
| LC D-210                                                           | ATTO495-AGGGAAA <b>A</b> GA <b>G</b> CGGATAAC     | 63.88   | 62.57 | 52.52   | 64.06 | 60.30   | <37.00 | 64.49   | 60.12 | 59.87     |  |         |  |         |  |           |  |           |  |  |
| LC D-211                                                           | ATTO495-AGGGAAA <b>A</b> GA <b>A</b> GGGAAGGATAAC | 64.07   | 64.13 | 52.05   | 64.84 | 61.14   | <37.00 | 64.99   | 61.00 | 61.00     |  |         |  |         |  |           |  |           |  |  |
| LC D-212                                                           | ATTO495-AGGGAAA <b>A</b> GA <b>T</b> GGATAAC      | 63.29   | 61.78 | 51.82   | 63.90 | 59.34   | <37.00 | 64.41   | 60.04 | 61.08     |  |         |  |         |  |           |  |           |  |  |
| LC D-224                                                           | ATTO495-AGGGAAA <b>A</b> AGGGAGGGATAAC            | 51.89   | 60.30 | < 37.00 | 61.78 | 57.34   | <37.00 | 62.30   | 57.72 | 58.59     |  |         |  |         |  |           |  |           |  |  |
| <b>Annealing 0,2°C/minute (Y = 10 minutes, Z = 280 seconds)</b>    |                                                   |         |       |         |       |         |        |         |       |           |  |         |  |         |  |           |  |           |  |  |
| LC D-200                                                           | ATTO495-AGGGAAAAGAAGGGAGGGATAAC                   | 70.26   | 70.15 | 55.99   | 72.02 | 68.70   | <37.00 | 72.39   | 69.78 | 70.81     |  |         |  |         |  |           |  |           |  |  |
| LC D-201                                                           | ATTO495-AGGGAAAAGAAGGGAGGGATAAC                   | 62.34   | 63.92 | 47.36   | 65.50 | 62.25   | <37.00 | 66.06   | 62.62 | 63.64     |  |         |  |         |  |           |  |           |  |  |
| LC D-202                                                           | ATTO495-AGGG <b>AAA</b> AGAAGGGAGGGATAAC          | 62.34   | 65.60 | 47.14   | 66.71 | 63.46   | <37.00 | 66.99   | 63.64 | 63.92     |  |         |  |         |  |           |  |           |  |  |
| LC D-203                                                           | ATTO495-AGGG <b>T</b> AAAAGAAGGGAGGGATAAC         | 62.43   | 63.36 | 47.36   | 65.32 | 61.59   | <37.00 | 66.12   | 62.59 |           |  |         |  |         |  |           |  |           |  |  |



## Examples of dissociation and annealing melting curves (from supplementary data table 6)

LC D-284: Ramp rate of 0.2°C/minute at pH 5.5

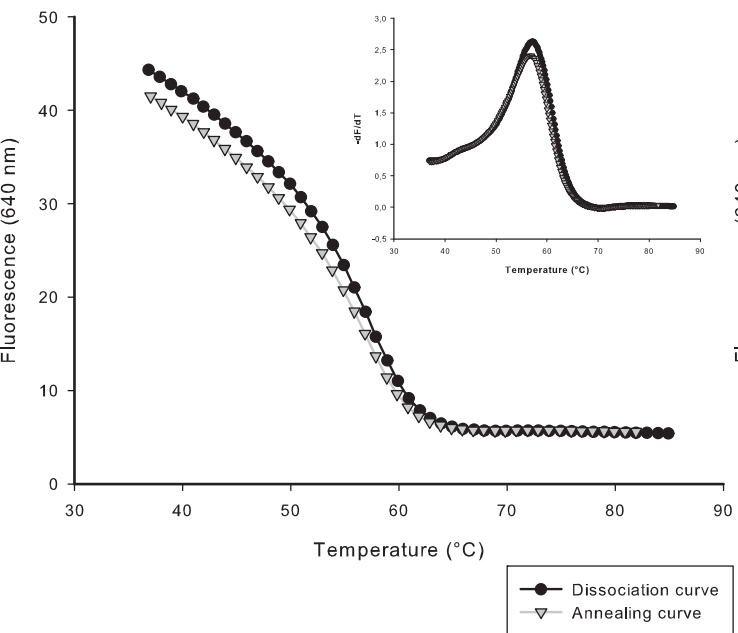

LC D-236: Ramp rate of 0.2°C/minute at pH 5.5

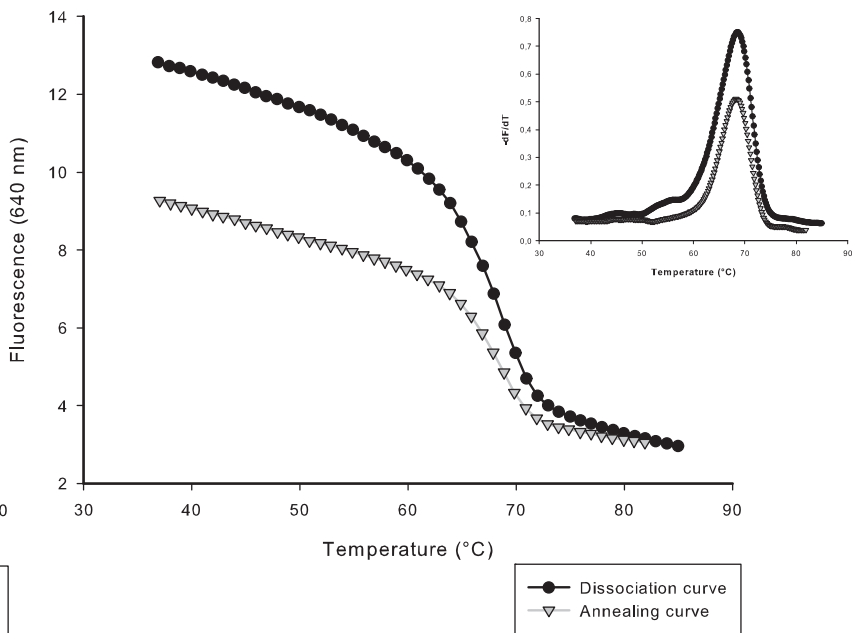

LC D-284: Ramp rate of 3°C/minute at pH 5.5

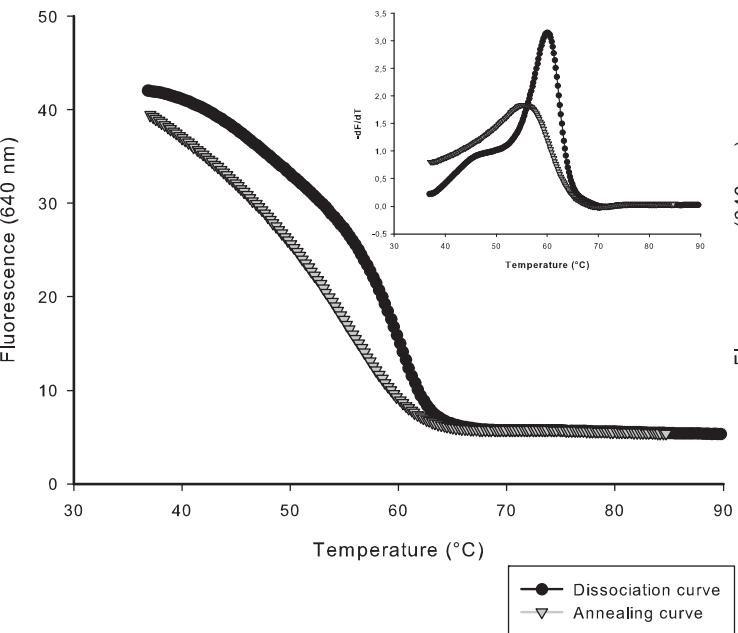

LC D-236: Ramp rate of 3°C/minute at pH 5.5

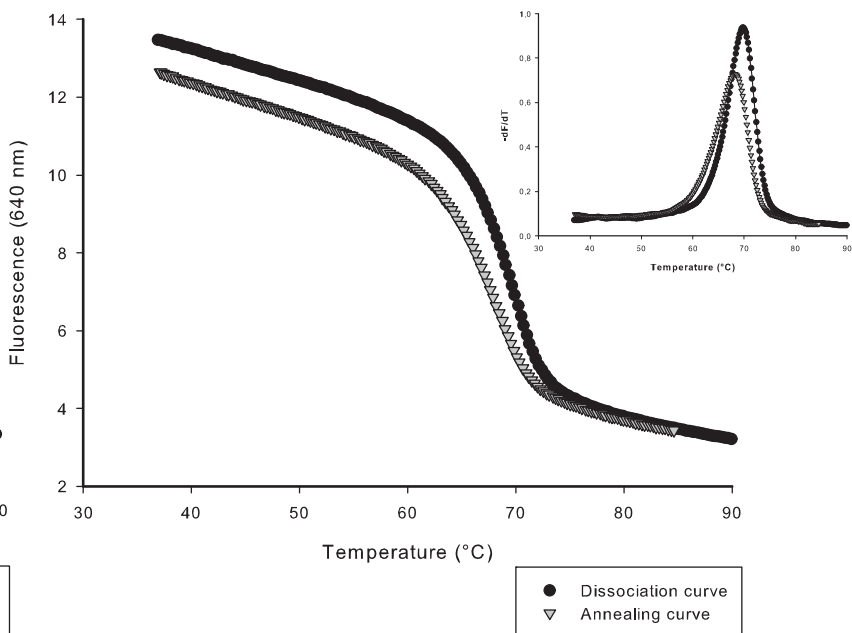

Parallel triplexes consisting of LC D-200 as target strand with LC D-256 as antiparallel duplex strand and either LC D-284 (DNA oligonucleotide) or LC D-236 (oligonucleotide with 5' and 3' placed TINAs) as triplex forming oligo (TFO) strands. Melting curves collected using 1.0  $\mu$ M of each oligonucleotide in sodium acetate buffer at pH 5.5 (50 mM NaOAc, 100 mM NaCl and 10 mM MgCl<sub>2</sub>). At a ramp rate of 0.2°C/minute no hysteresis is observed for TFOs with an without TINA at pH 5.5. At a ramp rate of 3°C/minute parallel shifted dissociation curves with hysteresis are observed for both DNA oligonucleotides and oligonucleotides with TINA modifications. Examples are taken from supplementary data table 7.
